# **Ancient coding sequences underpin the spatial patterning of gene expression in C<sub>4</sub> leaves**

Ivan Reyna-Llorens<sup>1</sup>, Steven J. Burgess<sup>1</sup>, Ben P. Williams, Susan Stanley, Chris Bournnell and Julian M. Hibberd

Department of Plant Sciences, Downing Street, University of Cambridge, Cambridge CB2 3EA, UK.

I-RL - [suallorens@gmail.com](mailto:suallorens@gmail.com)

SJB - [sjb287@cam.ac.uk](mailto:sjb287@cam.ac.uk)

BPM - [bp.williams0@gmail.com](mailto:bp.williams0@gmail.com)

SS - [ss383@cam.ac.uk](mailto:ss383@cam.ac.uk)

CB - [cmb211@cam.ac.uk](mailto:cmb211@cam.ac.uk)

JMH (corresponding) - [jmh65@cam.ac.uk](mailto:jmh65@cam.ac.uk). Tel - 44(0) 1223 766547

## 15 **Abstract**

16 Photosynthesis is compromised in most plants because an enzymatic side-reaction fixes O<sub>2</sub>  
 17 instead of CO<sub>2</sub>. The energetic cost of oxygenation led to the evolution of C<sub>4</sub> photosynthesis. In  
 18 almost all C<sub>4</sub> leaves compartmentation of photosynthesis between cells reduces oxygenation and  
 19 so increases photosynthetic efficiency. Here we report that spatial expression of most C<sub>4</sub> genes is  
 20 controlled by intragenic *cis*-elements rather than promoter sequence. Two DNA motifs that co-  
 21 operatively specify the patterning of genes required for C<sub>4</sub> photosynthesis are identified. They are  
 22 conserved in plants and algae that use the ancestral C<sub>3</sub> pathway. As these motifs are located in  
 23 exons they represent duons determining both gene expression and amino acid sequence. Our  
 24 findings provide functional evidence for the importance of transcription factors recognising coding  
 25 sequence as previously defined by genome-wide binding studies. Furthermore, they indicate that  
 26 C<sub>4</sub> evolution is based on ancient DNA motifs found in exonic sequence.

## 27 Introduction

28        Photosynthesis allows atmospheric CO<sub>2</sub> to be fixed into organic molecules and therefore forms  
 29 the basis of life on the planet. When plants moved onto land they inherited the photosynthetic  
 30 system first developed by bacteria, in which the enzyme RuBisCO generates the three-carbon  
 31 compound phosphoglyceric acid (PGA) (Anbar et al., 2007). As PGA contains three carbon atoms,  
 32 this form of photosynthesis is known as the C<sub>3</sub> pathway. However, a side-reaction of RuBisCO  
 33 fixes O<sub>2</sub> rather than CO<sub>2</sub>, and this generates the toxic compound phosphoglycolate. Although  
 34 plants use the photorespiratory pathway to remove phosphoglycolate, it is energetically expensive  
 35 and some carbon is lost in the process (Bauwe et al., 2010). Around 30 million years ago, some  
 36 plants evolved a photosynthetic system in which CO<sub>2</sub> is concentrated around the enzyme Ribulose  
 37 Biphosphate Carboxylase Oxygenase (RuBisCO) such that oxygenation is minimised, and so  
 38 photosynthetic efficiency increases by around 50% (Hatch and Slack 1966; Sage et al., 1999).  
 39 These species now represent the most productive vegetation on the planet (Sage et al., 2004; Ray  
 40 et al., 2012), and because they initially generate a C<sub>4</sub> acid in the photosynthetic process, are  
 41 known as C<sub>4</sub> plants.

42        The mechanism by which CO<sub>2</sub> supply to RuBisCO is increased in C<sub>4</sub> species depends on the  
 43 spatial separation of photosynthetic reactions. Initial production of C<sub>4</sub> acids takes place in one  
 44 compartment, and then their re-release to concentrate CO<sub>2</sub> occurs in another. Although in some  
 45 species this can take place within a single cell (Edwards et al., 2004), in the majority of C<sub>4</sub> plants,  
 46 evolution has co-opted the existing compartmentation afforded by multi-cellularity to separate  
 47 these carboxylation and decarboxylation reactions (Hatch and Slack 1966). The separation of  
 48 photosynthesis between cells requires the co-ordinated regulation of numerous enzymes and  
 49 transporters. For example, in mesophyll (M) cells, enzymes such as carbonic anhydrase,  
 50 phosphoenolpyruvate carboxylase and malate dehydrogenase allow the production of C<sub>4</sub> acids  
 51 from HCO<sub>3</sub><sup>-</sup>, whereas in the bundle sheath (BS), high activities of C<sub>4</sub> acid decarboxylases and  
 52 RuBisCO allow efficient entry of carbon into the Calvin-Benson cycle (Furbank, 2011). The  
 53 importance of each enzyme accumulating in the correct cell-type is considered critical for the

efficiency of the pathway, and so the spatial patterning of photosynthesis gene expression in C<sub>4</sub> plants has received significant attention. As with most other eukaryotic systems, although post-transcriptional and translational regulation are acknowledged (Hibberd and Covshoff 2010; Kajala et al., 2011; Williams et al., 2016), most analysis has focussed on the importance of promoters in regulating gene expression in M or BS cells (Sheen, 1991; Viret et al., 1994; Taniguchi et al., 2000; Nomura et al., 2000; Kaush et al., 2001; Gowik et al., 2004; Akyildiz et al., 2007). Previously, we found that expression of multiple *NAD-dependent MALIC ENZYME (NAD-ME)* genes in the BS of C<sub>4</sub> *Gynandropsis gynandra* was dependent on sequences not found in promoter elements upstream of these genes, but rather in exonic sequence within the gene (Brown et al 2011). Whilst the exact *cis*-elements were not defined, orthologous genes from the C<sub>4</sub> model *Arabidopsis thaliana* also contained the regulatory DNA necessary for preferential expression in BS cells of the C<sub>4</sub> leaf. Overall, these data implied that evolution has repeatedly made use of pre-existing regulatory DNA found within genic sequence to pattern gene expression in C<sub>4</sub> leaves. However, the specific sequences responsible for preferential expression in the BS were not defined, and so it was not clear if exactly the same *cis*-elements were used by each gene. Furthermore, without a definition of the motifs specifying expression in the BS contained within these *NAD-ME* genes, it was not possible to identify if they control expression of additional genes, nor to understand if these same elements are used in other species. To address this, we first identified the sequence motifs responsible for patterning these *NAD-ME* genes, and in doing so, show that they act as *duons* impacting both on patterns of gene expression as well as amino acid sequence of the encoded protein. We used these sequence motifs to predict and validate other genes that are also controlled by these elements, and also to investigate the likely origin of such regulation within land plants. We report both widespread use of, and ancient origins for, two *cis*-elements that act within coding sequence co-operatively to generate BS expression in C<sub>4</sub> leaves. We place these findings in the context of genome-wide studies reporting the widespread binding of transcription factors to genic sequence rather than promoter elements, as well as the polyphyletic evolution of the complex C<sub>4</sub> pathway.



## 81 Results

### 82 Two motifs within coding sequence act co-operatively to generate BS specificity

83 To better understand the mechanism responsible for generating preferential gene expression in  
84 BS cells analysis was focussed on a region of 240 nucleotides within the coding region of *GgNAD-*  
85 *ME1*. Although previous work showed this fragment confers BS accumulation of GUS in *G.*  
86 *gynandra* (Brown et al., 2011) it was unclear if this was due to recognition of the DNA or RNA  
87 sequence. To test if regulation was lost when a complementary mRNA was produced, an  
88 antisense construct for this 240 nucleotide sequence (Figure 1A) was placed under control of the  
89 constitutive CaMV35S promoter, and fused to *uidA* encoding the  $\beta$ -glucuronidase (GUS) reporter.  
90 Whereas the CaMV35S promoter alone lead to similar accumulation of GUS in M and BS cells  
91 (Figure 1B), microprojectile bombardment of the antisense construct maintained preferential  
92 accumulation in the BS (Figure 1B) indicating that DNA sequence is recognised by *trans*-acting  
93 factors and therefore that preferential accumulation in BS cells is regulated during transcription.

94 To identify the specific nucleotides responsible for BS expression within this 240bp fragment a  
95 deletion series was generated by removing fragments from either the 5' or 3' end of *GgNAD-ME1*  
96 (Figure 1A). Deletion of 24, and 78 nucleotides from the 3' end did not affect preferential  
97 accumulation in BS cells (Figure 1A-B), but removal of 90 nucleotides resulted in loss of cell  
98 specificity (Figure 1A-C). Similarly, deletion of the first 63 nucleotides from the 5' end did not  
99 abolish preferential accumulation of GUS in BS cells, but removing 78 nucleotides did (Figure 1A-  
100 C). A fragment incorporating bases 64 to 162 was sufficient to retain cell preferential accumulation  
101 in the BS both after microprojectile bombardment (Figure 1B), and after production of stable  
102 transformants (Figure 1C, S2). We conclude that one region composed of the nucleotides  
103 TTGGGTGAA (64 to 79 downstream of the translational start codon) and a second region made up  
104 of nucleotides GATCCTTG (141 to 162 nucleotides downstream of the translational start codon)  
105 are necessary for preferential accumulation of *GgNAD-ME1* in BS cells of *C<sub>4</sub> G. gynandropsis*.  
106 These two regions will hereafter be referred to as Bundle Sheath Motif 1a (BSM1a) and Bundle  
107 Sheath Motif 1b (BSM1b), and they are separated by 75 nucleotides.

To test if the sequence separating BSM1a and BSM1b is required for preferential expression in BS cells, it was replaced with exogenous sequence lacking homology to the native region of *GgNADME1* (Figure 2A). The fragment that contained BSM1a and BSM1b separated by this exogenous sequence led to preferential accumulation of GUS in BS cells (Figure 2A, 2B). Although the exact sequence separating BSM1a and BSM1b does not impact on their function, the distance separating them could play an important role. The length of the spacer was therefore modified, and this indicated that BSM1a and BSM1b do not generate preferential accumulation in the BS cells when fused together directly, or when separated by 999 base pairs (Figure S3). However, when the intervening sequence was between 21 and 550 base pairs preferential accumulation in BS cells occurred (Figure S3). Site-directed mutagenesis of each motif showed that the first two nucleotides of BSM1a had no impact on preferential accumulation of GUS in the BS, but that substitution of the guanine at position 3 and thymine at position 6 abolished BS accumulation of GUS (Figure 2B). Similarly, three and five base pair substitutions in BSM1b resulted in a decrease of cell specificity (Figure 2B). Based on these results we propose that within the coding region of *NAD-ME1*, two separate sequences separated by a spacer are necessary and sufficient to generate strong expression in BS cells.

### **BSM1a and 1b specify the spatial patterning of additional genes**

Although thousands of genes are differentially expressed between M and BS cells of *C<sub>4</sub>* plants, to our knowledge no DNA motifs that determine the patterning of more than one gene in BS cells have been identified. To test whether BSM1a and BSM1b operate more widely to generate preferential expression in BS cells, the coding sequences of other genes were scanned using FIMO (Grant et al., 2011). Sequences similar to BSM1a and BSM1b in genes annotated mitochondrial *MALATE DEHYDROGENASE (mMDH)* and *GLYCOLATE OXIDASE 1 (GOX1)* were identified. In both cases, fragments from *mMDH* and *GOX* containing the two motifs were sufficient to drive BS accumulation of GUS in *G. gynandra* (Figure 3A), and when they were deleted preferential accumulation in BS cells was lost (Figure 3A). The identification of BSM1a and BSM1b

in these additional genes allowed consensus sequences to be defined (Figure 3B). These data imply that the DNA sequences defined by BSM1a and BSM1b form the basis of a regulon that operates through conserved *cis*-elements located in the exons of multiple genes to generate preferential expression in BS cells of C<sub>4</sub> leaves. Altogether these results suggest multiple gene families involved in C<sub>4</sub> photosynthesis and photorespiration have been recruited into the BS (Figure 3C) using a regulatory network based on these two motifs.

### **BSM1a and BSM1b are ancient and conserved within land plants**

Using the sequences that define BSM1a and BSM1b (Figure 3B), and the minimum and maximum distance that can separate them, *NAD-ME* genes from *G. gynandra* and the closely related C<sub>3</sub> species *A. thaliana* were assessed. Similar sequences close to the predicted translational start site of *GgNAD-ME2*, *AtNAD-ME1* and *AtNAD-ME2* were identified (Figure 4A). BSM1a is located in the predicted mitochondrial transit peptide and its position varies relative to the translational start site. It is noteworthy that compared with *AtNAD-ME2* and *CgNAD-ME1* & 2, BSM1a is found on the opposite DNA strand in *AtNAD-ME1*, further supporting the notion that BS preferential expression is mediated by a transcription-based mechanism. BSM1b is located in the mature processed protein and its position appears invariant (Figure 4A). When either of these motifs was removed from *GgNAD-ME2*, *AtNAD-ME* or *AtNAD-ME2* preferential accumulation in BS cells was lost (Figure 4B). These data indicate that the consensus sequences defined by BSM1a and BSM1b from these eight genes (Figure 4C) are necessary and sufficient to generate BS expression in the C<sub>4</sub> leaf.

As BSM1a and BSM1b are present in *NAD-ME* genes of C<sub>3</sub> *A. thaliana*, we next investigated the extent to which these sequences are conserved across 1135 wild inbred *A. thaliana* accessions with genome sequence available. Single nucleotide polymorphism (SNP) data were retrieved (1001 Genomes Consortium, 2016), and analysis showed an unexpectedly high level of conservation with no SNPs detected within either BSM1a or BSM1b (Figure 5A&B). This high level of conservation is consistent with both Motifs acting as "duons" in C<sub>3</sub> *A. thaliana* as well as C<sub>4</sub> *G.*

*gynandra*. To investigate whether these motifs are also found more widely in *NAD-ME* genes across the land plant phylogeny, *NAD-ME* gene sequences were retrieved from 44 species in Phytozome (v10.1, [www.phytozome.org](http://www.phytozome.org)) and analysed for the presence of BSM1a and BSM1b (Figure S4). All dicotyledons contained at least one *NAD-ME* gene carrying the sequences that define BSM1a and BSM1b (Figure 5C). In the monocotyledons, BSM1a was completely conserved in rice, *Brachypodium* and *Panicum*. Although BSM1b showed one nucleotide substitution in all monocotyledonous genomes available it appears more ancient as it is conserved in spikemoss and moss (Figure 5C, S4). The hypothesis that BSM1b is more ancient is supported by the finding that a version with one nucleotide substitution was also found in the chlorophyte algae *C. reinhardtii* (Figure S4). It was also noticeable that both BSM1a and BSM1b are highly conserved in *GOX1* and *MDH* genes in land plants, and that BSM1b appears more ancient as it is found in all *GOX1* genes from all land plants and even in the chlorophyte algae. It is possible that BSM1a found in land plants is derived from the *MDH* genes of the algae, as it is observed in *C. subellipsoidea* and *M. pusilla*, two members of the chlorophyta. Comparing the sequence of BSM1a and BSM1b in *NAD-ME*, *MDH* and *GOX1* indicates that BSM1b is less variant, but in both cases, their conservation implies an ancient role across the plant kingdom that likely is derived from the algal ancestor.

## Widespread use of genic DNA for spatial patterning of gene expression

Although genome-wide analysis of transcription factor binding sites indicates a significant amount of binding occurs within genes, to our knowledge, there is little functional knowledge confirming the importance of such sites. Having functionally defined BSM1a and BSM1b as being important for patterning gene expression in the *C<sub>4</sub>* leaf, the extent to which other genes important for the *C<sub>4</sub>* pathway are regulated by sequences within the gene rather than the promoter was investigated. Based on *de novo* transcriptome assemblies, transcribed regions of twelve genes recruited into *C<sub>4</sub>* photosynthesis in *G. gynandra* were cloned, with 3' and 5' ends verified using 3'RACE and genome walking (Supplementary Files 1 and 2). The gene sequences were placed

under control of the constitutive CaMV35S promoter, and fused to *uidA* encoding the  $\beta$ -glucuronidase (GUS) reporter. Combined with publically available datasets for *PPDK* and *CA* (Kajala et al 2011, Williams et al., 2016) this approach showed that preferential expression of genes encoding  $C_4$  proteins in either M or BS cells is commonly driven by elements within their coding sequences (Figure 6). *CA2*, *CA4*, *PPCK1* and *PPDK* gene sequence without their endogenous promoters all led to preferential accumulation of GUS in M cells, whereas *MDH1*, *NAD-ME1* and *NAD-ME2* caused preferential accumulation of GUS in the BS. *Rubisco Activase (RCA)* coding sequence drove a small but significant increase in the number of BS accumulating GUS (Figure 6A) (p-value <0.05, CI 95%). These data indicate that regulatory elements within genic sequence impact on cell preferential expression in the majority of genes recruited into the core  $C_4$  pathway.

In some cases, cell-preferential expression of  $C_4$  genes has evolved from regulatory elements found in ancestral  $C_3$  species (Kajala, et al., 2011; Brown et al., 2011, Williams et al., 2013). To investigate the extent to which genic sequence from ancestral  $C_3$  species contain regulatory elements sufficient for expression in either M or BS cells, orthologues to each of the  $C_4$  genes were cloned from *A. thaliana*, placed under the same reporter system and tested by microprojectile bombardment. This showed that with the exception of *AtPPCK1*, the orthologous genes from  $C_3$  *A. thaliana* contained regulatory elements in coding sequence that can specify spatial patterning of gene expression in the  $C_4$  leaf of *G. gynandra* (Figure 6). Overall, these data indicate that spatial patterning of gene expression in the  $C_4$  leaf is largely derived from regulatory elements present in coding sequences of genes found in the ancestral  $C_3$  state. In the case of those defined at the nucleotide level in *NAD-ME1*, *NAD-ME2*, *MDH* and *GOX1*, these elements appear highly conserved and therefore ancient within land plants.

## 212 Discussion

213 The data presented here, combined with previous reports (Brown et al. 2011; Kajala et al. 2011;  
214 Williams et al. 2016) portray an overview of the contribution that untranslated regions (UTRs) and  
215 coding sequences make to the generation of cell-specific gene expression in leaves of *C<sub>4</sub>* *G.*  
216 *gynandropsis*. Eight of the eleven core *C<sub>4</sub>* cycle genes possess regulatory elements in their  
217 transcript sequences that are sufficient for preferential accumulation in either M or BS cells of the  
218 *C<sub>4</sub>* leaf. These data strongly imply that, in addition to promoters being involved in generating cell-  
219 specificity in *C<sub>4</sub>* leaves (Gowik et al., 2004; Sheen, 1999), coding sequences and UTRs play a  
220 widespread role in the preferential accumulation of *C<sub>4</sub>* transcripts to either M or BS cells. It remains  
221 to be seen whether this high degree of regulation from genic sequence is a common phenomenon  
222 in *C<sub>4</sub>* leaves of species other than *G. gynandropsis*, or whether it is critical for the spatial control of  
223 gene expression in other tissues and other species. However, as genome-wide studies of  
224 transcription factor recognition sites in organisms as diverse as *A. thaliana* and human cells  
225 (Stergachis et al., 2013; Sullivan et al., 2014) have reported significant binding occurs in genic  
226 sequence, we anticipate many more examples of spatial regulation of gene expression being  
227 associated with *cis*-elements outside of promoter sequences.

228 The accumulation of *GgNADME1*, *GgNADME2*, *mMDH* and *GOX1* transcripts in BS cells is  
229 dependent on the co-operative function of two *cis*-elements that are separated by a spacer  
230 sequence, all of which are located in the first exon of these genes. These motifs are conserved  
231 both in their sequences, but also in the number of nucleotides that separates them. In orthologous  
232 *NAD-ME* genes from *C<sub>3</sub>* *A. thaliana*, which diverged from the Cleomaceae ~38 million years ago  
233 (Schranz and Mitchell-Olds, 2006; Couvreur et al., 2010), although these motifs are present, they  
234 are not sufficient to generate cell preferential expression in the *C<sub>3</sub>* leaf (Brown et al. 2011). This  
235 finding indicates that for *NAD-ME* genes to be preferentially expressed in BS cells of *C<sub>4</sub>* plants, a  
236 change in the behaviour of one or more *trans*-factors was a fundamental event. At least in *G.*  
237 *gynandropsis*, evolution appears to have repeatedly made use of *cis*-elements that exist in genes  
238 of *C<sub>3</sub>* species that are orthologous to those recruited into *C<sub>4</sub>* photosynthesis (Brown et al., 2011;

239 Kajala et al., 2012; Williams, Burgess et al., 2016). The alteration in *trans*-factors such that they  
240 recognise ancestral elements in *cis* in the M or BS therefore appears to be an important and  
241 common mechanism associated with evolution of the highly complex C<sub>4</sub> system.

242 BSM1a and BSM1b, which we defined first in the *GgNAD-ME1* gene, are also present and  
243 operational in the *GgNAD-ME2*, *GgMDH1* and *GgGOX1* genes. If, as seems likely, these motifs  
244 are recognised by the same *trans*-factors to generate preferential expression of all of these genes  
245 in the C<sub>4</sub> BS, this finding also identifies a mini-regulon that during evolution could have recruited at  
246 least four genes simultaneously into specialised roles in the BS. By combining Flux Balance  
247 Analysis constrained by a model of carbon fixation, it has previously been proposed that  
248 upregulation and preferential expression of multiple genes of the C<sub>4</sub> cycle would be required to  
249 balance nitrogen metabolism between M and BS cells (Mallmann et al., 2014). The presence of  
250 BSM1a and BSM1b in at least four genes from *G. gynandropsis* provides a mechanism that may  
251 have facilitated this patterning of multiple genes during the evolution of C<sub>4</sub> photosynthesis.

252 The dual role of exons in protein coding as well as the regulation of gene expression has  
253 received significant attention in vertebrates (Lang et al., 2005; Nguyen et al., 2007; Goren et al.,  
254 2006; Tumpel et al., 2008; Dong et al., 2010; Stergachis et al., 2013). Although, 11% of  
255 transcription factor binding sites are located in exonic sequence in *A. thaliana* (Sullivan et al.,  
256 2014), to our knowledge, the identification of BSM1a and BSM1b represents the first functional  
257 evidence for *cis*-elements in plant exons. The fact that these motifs are present in C<sub>3</sub> *A. thaliana*,  
258 and in fact, also found in the genomes of many land plants and some chlorophyte algae, indicates  
259 that these duons play ancient and conserved roles in photosynthetic organisms. The role of such  
260 regulatory elements within coding sequences has previously been proposed to be associated with  
261 constraints on both protein coding function and codon bias. For example, mutation to these *cis*-  
262 elements could be deleterious to both the correct function of the protein, but also to codon usage  
263 and so translational efficiency (Robinson et al., 1984; Tuller et al., 2010; Nakahigashi et al., 2014).  
264 If this is the case, BSM1a and BSM1b could be highly conserved across deep phylogeny because  
265 of strong positive selection pressure on these elements due to impact on translation, and this



conservation is then co-opted to also regulate transcription during the evolution of  $C_4$  photosynthesis to generate cell-specific gene expression. Establishing the role of BSM1a and BSM1b in  $C_3$  plants would provide insight into the extent to which their role has altered during the transition from  $C_3$  to  $C_4$  photosynthesis.

Duons under strong selection pressure may represent a rich resource of *cis*-elements upon which the  $C_4$  pathway has evolved. Although  $C_4$  photosynthesis is a complex trait that requires multiple changes to gene expression, the repeated recurrence of  $C_4$  species across multiple plant lineages suggests that a relatively low number of changes may be required to acquire the  $C_4$  syndrome (Sinha & Kellogg, 1996; Hibberd et al., 2008; Westhoff & Gowik, 2010). A single  $C_4$  master switch has been proposed (Westhoff & Gowik, 2010) but despite multiple comparative transcriptomic studies (Brautigam et al., 2011; Aubry et al., 2014; Kulahoglu et al., 2014), there is as yet no evidence for it. Given the repeated and highly convergent evolution of the  $C_4$  pathway, as well as evidence that separate lineages can arrive at the  $C_4$  state via different routes (Williams et al., 2013), it appears more plausible that  $C_4$  photosynthesis made use of a number of gene sub-networks. This is now supported by a number of findings. First, just as core photosynthesis genes encoding the light harvesting complexes and Calvin-Benson-Bassham cycle are regulated by light, the vast majority of genes that encode proteins of the  $C_4$  cycle in  $C_3$  *A. thaliana* are also regulated by light signalling, yet, during the evolution of  $C_4$  photosynthesis there was a significant gain of responsiveness to chloroplast signalling (Burgess et al., 2016). Second, it has been suggested that evolution of the  $C_4$  pathway is associated with the recruitment of developmental motifs into leaves that in  $C_3$  species operate in roots (Kulahoglu et al., 2014). Lastly, the identification of the *cis*-element MEM2 (Williams, Burgess et al., 2016), which controls preferential expression of multiple genes in  $C_4$  M cells, and now BSM1a and BSM1b in four different genes that are strongly expressed in BS cells, indicates that that  $C_4$  evolution has made use of small-scale recruitment of gene sub-networks in both cell-types.



## 291 **Methods**

### 292 **Growth of plant material and production of reporter constructs**

293 Sterile *G. gynandra* seed was sown directly from intact pods and germinated on moist filter  
294 papers in the dark at 30°C for 24 h. Seedlings were then transferred to Murashige and Skoog (MS)  
295 medium with 1% (w/v) sucrose and 0.8% (w/v) agar (pH 5.8) and grown for a further 13 days in a  
296 growth room at 22°C and 200  $\mu\text{mol m}^{-2} \text{s}^{-1}$  photon flux density (PFD) with a photoperiod of 16 h  
297 light.

298 *G. gynandropsis* mRNA sequences were predicted from a *de novo* assembled transcriptome  
299 and UTRs were verified by 3' RACE (Supplementary File I) and genome walking (Supplementary  
300 File 2). *A. thaliana* cDNA sequences were extracted from Phytozome v10.1. Reporter constructs  
301 were generated by ligation of the fragment of interest with a modified reporter cassette containing  
302 the Cauliflower Mosaic Virus 35S promoter (pCaMV35S), 13 bp of its 5'UTR, the *uidA* gene  
303 (encoding GUS), and the *nosT* terminator sequence (Brown et al., 2011). Vectors were assembled  
304 in this cassette using Gibson assembly (Gibson et al., 2009) (Supplementary Table I). Site-directed  
305 mutagenesis was performed using the Quickchange method.

306

### 307 **Microprojectile bombardment and production of stable transformants**

308 350 ng M-17 tungsten particles (1.1- $\mu\text{m}$  diameter; Bio-Rad) were washed with 100% (v/v)  
309 ethanol and resuspended in ultrapure water. 1.5  $\mu\text{g}$  of plasmid DNA was mixed with the tungsten  
310 particles while vortexing at slow speed. After addition of the DNA, 50  $\mu\text{L}$  2.5 M calcium chloride  
311 (Fisher Scientific) and 10  $\mu\text{L}$  100 mM spermidine (Sigma-Aldrich) were added to the particle  
312 suspension to facilitate binding of DNA to the particles. The tungsten-DNA suspension was  
313 incubated for 10 min on ice, with frequent agitation to prevent pelleting. Particles were then  
314 washed and resuspended in 100  $\mu\text{L}$  100% (v/v) ethanol. 10  $\mu\text{L}$  aliquots of tungsten-DNA were  
315 transferred to plastic macrocarriers (Bio-Rad) and allowed to dry for 3 minutes at room  
316 temperature. Three macrocarriers were used for each transformation. Following bombardment with  
317 a Bio-Rad PDS-1000/He particle delivery system, seedlings were placed upright in a sealed Petri

dish, with the base of their stems immersed in 0.5x MS medium and incubated in a growth room at 22°C and 150  $\mu\text{mol m}^{-2} \text{s}^{-1}$  PFD with a photoperiod of 16 h light for 48 h, prior to GUS staining. Stable plant transformation was performed by introducing constructs into *G.gynandra* via *Agrobacterium tumefaciens* LBA4404 as described previously (Newell et al., 2009). Plant tissue, after bombardment or stable transformation, was GUS stained (0.1 M  $\text{Na}_2\text{HPO}_4$  pH7.0, 0.5 mM K ferricyanide, 0.5 mM K ferrocyanide, 0.06% v/v Triton X-100, 10 mM  $\text{Na}_2\text{EDTA}$  pH8.0, 1mM X-gluc) at 37°C for 6-16 h and then fixed in a 3:1 solution of ethanol to acetic acid at room temperature for 30 min. Chlorophyll was cleared with 70% (v/v) ethanol and tissue treated with 5% (w/v) NaOH at 37°C for 2 h. M and BS cells containing GUS were identified and counted using phase-contrast microscopy. At least 50 cells were counted per construct in each experiment, and for each construct, three independent experiments were conducted (Supplementary Table II).

### **cis-Element prediction and localization**

*De novo* motif prediction was performed using the Multiple Em for Motif Elucidation (MEME) suite v.4.8.1 with the following parameters: *meme sequences.fa -dna -oc. -nostatus -time 18000 -maxsize 60000 -mod oops -nmotifs 3 -minw 7 -maxw 9 -revcomp*. To scan for motif instances across various datasets FIMO was used with the following parameters: *fimo --oc. --verbosity 1 --thresh 0.1 motifs.meme sequences.fa*. Only hits located within the first 550 bp, allowing a spacing between the motifs of 35 to 550 bp were accepted.

## 337 **Figure legends**

### 338 **Figure S1: Transformation of *G. gynandra* M and BS cells by microprojectile bombardment.**

339 Leaves of *G. gynandra* arranged concentrically prior to bombardment (A). Representative GUS  
340 stained *G. gynandra* leaf transformed with *pCaMV35s:GgNAD-ME1(25-240bp)::gfp/uidA::nosT* (B).  
341 Mesophyll cells (C) and Bundle Sheath cells (D, black arrows) stained with GUS after  
342 bombardment. Scale bars represent 100  $\mu$ m.

343

344 **Figure S2: Pixel intensity of stable transgenic lines.** Pixel intensities across regions of the leaf  
345 containing mesophyll and bundle sheath. Data are derived from GUS stained leaves from three  
346 independent transgenic lines. Data are presented as histograms for whole datasets and dots that  
347 represent single measurements. At least 20 measurements were made per transgenic line.

348

349 **Figure S3: Topological requirements for BSM1a and BSM1b function.** Summary of the  
350 constructs used in this experiment. BSM1a and BSM1b were separated by 0, 21, 240, 347, 413,  
351 550 and 999 base pairs derived from the gene encoding Green Fluorescent Protein (GFP) (A).  
352 Percentage of cells containing GUS after microprojectile bombardment of *G. gynandra* leaves.  
353 Bars represent the percentage of stained cells in Bundle Sheath (BS - blue) and mesophyll (M -  
354 grey) cells. Error bars denote the standard error of the mean. \* represents statistically significant  
355 differences with P-values <0.05 and CI = 95% determined by a one-tailed t test.

356

357 **Figure S4: Location of BSM1a and BSM1b across the land plant phylogeny.** BSM1a and  
358 BSM1b in *NAD-ME*, *mMDH* and *GOX1* coding sequences retrieved from 44 species in Phytozome  
359 (v10.1). Green dots represent identical versions of the motifs while yellow and orange dots denote  
360 alternative versions with one or two substitutions respectively.

**Figure 1: Two regions within the coding sequence of *GgNAD-ME1* are necessary for preferential gene expression in the bundle sheath.** An antisense construct, as well as a deletion series from the 5' and 3' ends of *GgNAD-ME1*<sub>(1-240 bp)</sub> coding sequence were translationally fused to the *uidA* reporter under the control of the CaMV 35S promoter **(A)**. Percentage of cells containing GUS after microprojectile bombardment of *G. gynandra* leaves. Bars represent the percentage of stained cells in BS (blue) and M (grey) cells, error bars denote the standard error. \* represents statistically significant differences with P-values <0.05 and CI = 95% determined by a one-tailed t test **(B)**. GUS in *G. gynandra* transformants containing *uidA* fused to 1-240, 1-141, 79-240 and 64-162 bp from the translation starting site of *GgNAD-ME1* **(C)**. Scale bars, 100 µm.

**Figure 2: Two *cis*-elements that are sufficient for preferential accumulation of GUS in the bundle sheath.** Non-mutated and mutated versions of BSM1a and BSM1b flanked by 75 nucleotides derived from GFP were translationally fused to *uidA* encoding GUS and placed under control of the CaMV35S promoter **(A)**. The percentage of cells containing GUS after microprojectile bombardment of *G. gynandra* leaves **(B)**. Error bars denote the standard error. \* represents statistically significant differences with P-values <0.05 and CI = 95% determined by a one-tailed t test.

**Figure 3: BSM1a and BSM1b drive the expression of additional genes in C<sub>4</sub> and photorespiration pathways.** Sequences similar to BSM1a and BSM1b were predicted to be present in coding sequences of *mMDH* and *GOX1* genes of *G. gynandra*. Deleting the motifs resulted in the loss of preferential accumulation of GUS in the BS **(A)**. A consensus sequence for both motifs was defined based on *NAD-ME1*, *mMDH* and *GOX1* versions of the motifs **(B)**. BSM1a and BSM1b coordinate BS gene expression of multiple gene families (highlighted in red) relevant to C<sub>4</sub> photosynthesis and photorespiration **(C)**. Error bars denote the standard error. \* represents statistically significant differences with P-values <0.05 and CI = 95% determined by a one-tailed t test.

388

389 **Figure 4: Functional versions of BSM1a and BSM1b are present in additional *NAD-MEs*.**

390 BSM1a and BSM1b are found in *GgNAD-ME2* and in orthologs of *GgNAD-ME1&2* from the *C<sub>3</sub>*  
 391 species *A. thaliana* (**A**). Translational fusions carrying these fragments confer BS preferential  
 392 expression in *G. gynandra* leaves. When BSM1a or BSM1b were removed this pattern of GUS was  
 393 lost (**B**). A consensus sequence generated from all versions of BSM1a and BSM1b tested  
 394 experimentally (**C**). Error bars denote the standard error. \* represents statistically significant  
 395 differences with P-values <0.05 and CI = 95% determined by a one-tailed t test.

396

397 **Figure 5: BSM1a and BSM1b are highly conserved in land plants.** Single nucleotide  
 398 polymorphisms (SNP) in *AtNAD-ME1* (**A**) and *AtNAD-ME2* (**B**) genes from 1135 wild inbred *A.*  
 399 *thaliana* accessions. On the left, the position of BSM1a and BSM1b are highlighted by dashed blue  
 400 lines, UTRs, exons and introns are denoted by black, grey and white bars respectively on the X-  
 401 axis. To the right an expanded area representing exon 1, intron 1 and exon 2 is shown, with  
 402 BSM1a and BSM1b marked within the blue dashed lines. For both genes, no SNP were detected  
 403 in either motif. The presence of each motifs was investigated in gene sequences of *NAD-ME1*,  
 404 *mMDH* and *GOX1* retrieved from 44 species in Phytozome (v10.1). Each Pie-chart shows the  
 405 percentage of motif instances that were identical (green), or had 1 base pair (yellow), 2 base pair  
 406 (orange) substitutions or no similarity (white) detected.

407

408 **Figure 6: Pre-existing intragenic regulatory sequences play a major role controlling *C<sub>4</sub>***  
 409 **photosynthesis genes.** Coding sequences encoding for core proteins of the *C<sub>4</sub>* pathway from *G.*  
 410 *gynandra* together with orthologs from *A. thaliana* were translationally fused to *uidA* and placed  
 411 under control of the CaMV35S promoter. After introduction into *G. gynandra* leaves by  
 412 microprojectile bombardment mesophyll preferential expression of *CA2*, *CA4*, *PPDK* and *PPCK*,  
 413 together with Bundle Sheath preferential expression of *mMDH*, *NAD-ME1* and *NAD-ME2* were  
 414 observed (**A**). With the exception of *PPCK* these regulatory elements are conserved in orthogues

415 from *A. thaliana* (B). The contribution of intragenic sequences controlling gene regulation of the C<sub>4</sub>  
 416 pathway is summarized in (C), *CA2*, *CA4*, *PPDK* and *PPCK* (blue) and *mMDH*, *NAD-ME1&2* (red)  
 417 denote genes where intragenic sequences control cell preferential gene expression. Error bars  
 418 denote the standard error. \* represents statistically significant differences with P-values <0.05 and  
 419 CI = 95% determined by a one-tailed t test.

420

421 **Supplementary File 1:** FASTA sequences from Rapid Amplification of cDNA ends used to verify  
 422 3' UTR sequences of C<sub>4</sub> genes from *G. gynandra*.

423

424 **Supplementary File 2:** FASTA sequences from Genome Walking experiments used to verify 5'  
 425 ends of C<sub>4</sub> gene sequences from *G. gynandra*.

426

427 **Supplementary Table I:** Primer sequences used in generation of constructs, 3' RACE  
 428 experiments and Genome Walking.

429

430 **Supplementary Table II:** Total cell counts for the microprojectile bombardment experiments.

431

## 432 **Competing Interests**

433 The authors have no competing interests.

# References

- Akyildiz, M., Gowik, U., Engelmann, S., Koczor, M., Streubel, M., & Westhoff, P. (2007). Evolution and Function of a cis -Regulatory Module for Mesophyll-Specific Gene Expression in the C 4 Dicot *Flaveria trinervia*. *The Plant*, 19(November), 3391–3402. <http://doi.org/10.1105/tpc.107.053322>
- Anbar, A. D., Duan, Y., Lyons, T. W., Arnold, G. L., Kendall, B., Creaser, R. A., ... Hayes, M. (2007). A Whiff of Oxygen before the Great Oxidation Event? *Source: Science, New Series Nature Science Philos. Trans. R. Soc London Ser. B Science Rapid Commun. Mass Spectrom S. Ono et Ai Earth Planet Sei Lett. N. J. Beukes, Sediment Geol Econ. Geol*, 317(84), 1903–1906. <http://doi.org/10.1126/science.1140325>
- Aubry, S., Kelly, S., Kumpers, B., & Smith-Unna, R. (2014). Deep evolutionary comparison of gene expression identifies parallel recruitment of trans-factors in two independent origins of C 4 photosynthesis. *PLoS*. Retrieved from <http://journals.plos.org/plosgenetics/article?id=10.1371/journal.pgen.1004365>
- Bailey, T. L., Boden, M., Buske, F. A., Frith, M., Grant, C. E., Clementi, L., ... Noble, W. S. (2009). MEME S UITE : tools for motif discovery and searching. *Conflict*, 37(May), 202–208. <http://doi.org/10.1093/nar/gkp335>
- Bauwe, H., Hagemann, M., & Fernie, A. R. (2010). Photorespiration: players, partners and origin. *Trends in Plant Science*, 15(6), 330–6. <http://doi.org/10.1016/j.tplants.2010.03.006>
- Bräutigam, A., Kajala, K., Wullenweber, J., & Sommer, M. (2011). mRNA Blueprint for C□ Photosynthesis Derived from Comparative Transcriptomics of Closely Related C□ and C□ Species. *Plant Physiology*. Retrieved from <http://agris.fao.org/agris-search/search.do?recordID=US201301934603>
- Brown, N. J., Newell, C. a, Stanley, S., Chen, J. E., Perrin, A. J., Kajala, K., & Hibberd, J. M. (2011). Independent and parallel recruitment of preexisting mechanisms underlying C□ photosynthesis. *Science (New York, N.Y.)*, 331(6023), 1436–1439. <http://doi.org/10.1126/science.1201248>
- Burgess, S. J., Granero-moya, I., Grangé-guermente, M. J., Bournnell, C., Terry, M. J., & Hibberd, J. M. (2016). Ancestral light and chloroplast regulation form the foundations for C 4 gene expression. *Nature Plants*, 2(October). <http://doi.org/10.1038/nplants.2016.161>
- Consortium, 1001 Genomes. (2016). 1,135 Genomes Reveal the Global Pattern of Polymorphism in *Arabidopsis thaliana*. *Cell*. Retrieved from <http://www.sciencedirect.com/science/article/pii/S0092867416306675>
- Couvreux, T. L. P., Franzke, A., Al-Shehbaz, I. A., Bakker, F. T., Koch, M. A., & Mummenhoff, K. (2010). Molecular phylogenetics, temporal diversification, and principles of evolution in the mustard family (Brassicaceae). *Molecular Biology and Evolution*, 27(1), 55–71. <http://doi.org/10.1093/molbev/msp202>
- Crooks, G., Hon, G., Chandonia, J., & Brenner, S. (2004). NCBI GenBank FTP Site\nWebLogo: a sequence logo generator. *Genome Res*, 14, 1188–1190. <http://doi.org/10.1101/gr.849004.1>



473 Dong, X., Navratilova, P., Fredman, D., Drivenes, ??yvind, Becker, T. S., & Lenhard, B. (2009).  
 474 Exonic remnants of whole-genome duplication reveal cis-regulatory function of coding exons.  
 475 *Nucleic Acids Research*, 38(4), 1071–1085. <http://doi.org/10.1093/nar/gkp1124>

476 Edwards, G. E., Franceschi, V. R., & Voznesenskaya, E. V. (2004). SINGLE-CELL C<sub>4</sub>  
 477 PHOTOSYNTHESIS VERSUS THE DUAL-CELL (KRANZ) PARADIGM. *Annual Review of*  
 478 *Plant Biology*, 55(1), 173–196. <http://doi.org/10.1146/annurev.arplant.55.031903.141725>

479 Fontaine, V., Hartwell, J., Jenkins, G., & Nimmo, H. (2002). Arabidopsis thaliana contains two  
 480 phosphoenolpyruvate carboxylase kinase genes with different expression patterns. *Plant, Cell*  
 481 *& Environment*, 25, 115–122. <http://doi.org/10.1046/j.0016-8025.2001.00805.x>

482 Furbank, R. T. (2011). Evolution of the C<sub>4</sub> photosynthetic mechanism: Are there really three C<sub>4</sub>  
 483 acid decarboxylation types? *Journal of Experimental Botany*, 62(9), 3103–3108.  
 484 <http://doi.org/10.1093/jxb/err080>

485 G, L.-M. (2006). Comparative analysis identifies exonic splicing regulatory sequences—the  
 486 complex definition of enhancers and silencers. *Mol. Cell*, 22, 769. Retrieved from  
 487 <http://www.sciencedirect.com/science/article/pii/S1097276506003005>

488 Gibson, D. G., Young, L., Chuang, R.-Y., Venter, J. C., Hutchison, C. a, Smith, H. O., ... America,  
 489 N. (2009). Enzymatic assembly of DNA molecules up to several hundred kilobases. *Nature*  
 490 *Methods*, 6(5), 343–5. <http://doi.org/10.1038/nmeth.1318>

491 Gowik, U., Burscheidt, J., Akyildiz, M., Schlue, U., Koczor, M., Streubel, M., & Westhoff, P. (2004).  
 492 cis-Regulatory Elements for Mesophyll-Specific Gene Expression in the C<sub>4</sub> Plant Flaveria  
 493 trinervia , the Promoter of the C<sub>4</sub> Phosphoenolpyruvate Carboxylase Gene. *The Plant Cell*,  
 494 16(May), 1077–1090. <http://doi.org/10.1105/tpc.019729.C>

495 Grant, C. E., Bailey, T. L., & Noble, W. S. (2011). FIMO: Scanning for occurrences of a given motif.  
 496 *Bioinformatics*, 27(7), 1017–1018. <http://doi.org/10.1093/bioinformatics/btr064>

497 Hatch, M. D., & Slack, C. R. (1966). Photosynthesis by sugar-cane leaves. A new carboxylation  
 498 reaction and the pathway of sugar formation. *The Biochemical Journal*, 101(1), 103–11.  
 499 Retrieved from  
 500 <http://www.pubmedcentral.nih.gov/articlerender.fcgi?artid=1270070&tool=pmcentrez&renderty>  
 501 [pe=abstract](http://www.pubmedcentral.nih.gov/articlerender.fcgi?artid=1270070&tool=pmcentrez&renderty)

502 Hibberd, J. M., & Covshoff, S. (2010). The regulation of gene expression required for C<sub>4</sub>  
 503 photosynthesis. *Annual Review of Plant Biology*, 61(1), 181–207.  
 504 <http://doi.org/doi:10.1146/annurev-arplant-042809-112238>

505 Hibberd, J. M., Sheehy, J. E., & Langdale, J. A. (2008). Using C<sub>4</sub> photosynthesis to increase the  
 506 yield of rice — rationale and feasibility. *Current Opinion in Environmental Sustainability*, 11,  
 507 4–7. <http://doi.org/10.1016/j.pbi.2007.11.002>

508 Kajala, K., Williams, B. P., Brown, N. J., Taylor, L. E., & Hibberd, J. M. (2011). Multiple Arabidopsis  
 509 genes primed for direct recruitment into C<sub>4</sub> photosynthesis. *Plant Journal*, 69, 47–56.  
 510 Retrieved from <http://onlinelibrary.wiley.com/doi/10.1111/j.1365-313X.2011.04769.x/full>



511 Kausch, a P., Owen, T. P., Zachwieja, S. J., Flynn, a R., & Sheen, J. (2001). Mesophyll-specific,  
512 light and metabolic regulation of the C4 PPCZm1 promoter in transgenic maize. *Plant*  
513 *Molecular Biology*, 45(1), 1–15. <http://doi.org/10.1023/A:1006487326533>

514 Kim, D., Pertea, G., Trapnell, C., Pimentel, H., Kelley, R., & Salzberg, S. L. (2013). TopHat2:  
515 accurate alignment of transcriptomes in the presence of insertions, deletions and gene  
516 fusions. *Genome Biology*, 14(4), R36. <http://doi.org/10.1186/gb-2013-14-4-r36>

517 Krebbers, E., Seurinck, J., Herdies, L., Cashmore, A. R., & Timko, M. P. (1988). Four genes in two  
518 diverged subfamilies encode the ribulose-1,5-bisphosphate carboxylase small subunit  
519 polypeptides of *Arabidopsis thaliana*. *Plant Molecular Biology*, 11(6), 745–759.  
520 <http://doi.org/10.1007/BF00019515>

521 K lahoglu, C., Denton, A. K., Sommer, M., Ma , J., Schliesky, S., Wrobel, T. J., ... Weber, A. P. M.  
522 (2014). Comparative transcriptome atlases reveal altered gene expression modules between  
523 two Cleomaceae C3 and C4 plant species. *The Plant Cell*, 26(8), 3243–60.  
524 <http://doi.org/10.1105/tpc.114.123752>

525 Lang, G., Gombert, W. M., & Gould, H. J. (2005). A transcriptional regulatory element in the coding  
526 sequence of the human Bcl-2 gene. *Immunology*, 114, 25–36. <http://doi.org/10.1111/j.1365-2567.2004.02073.x>

528 Li, B., Ruotti, V., Stewart, R. M., Thomson, J. A., & Dewey, C. N. (2009). RNA-Seq gene  
529 expression estimation with read mapping uncertainty. *Bioinformatics*, 26(4), 493–500.  
530 <http://doi.org/10.1093/bioinformatics/btp692>

531 Mallmann, J., Heckmann, D., Br utigam, A., Lercher, M. J., Weber, A. P. M., Westhoff, P., &  
532 Gowik, U. (2014). The role of photorespiration during the evolution of C<inf>4</inf>  
533 photosynthesis in the genus *Flaveria*. *eLife*, 2014(3). <http://doi.org/10.7554/eLife.02478>

534 Nakahigashi, K., Takai, Y., Shiwa, Y., Wada, M., Honma, M., Yoshikawa, H., ... Mori, H. (2014).  
535 Effect of codon adaptation on codon-level and gene-level translation efficiency in vivo. *BMC*  
536 *Genomics*, 15(1), 1115. <http://doi.org/10.1186/1471-2164-15-1115>

537 Newell, C. A., Brown, N. J., Liu, Z., Pflug, A., Gowik, U., Westhoff, P., & Hibberd, M. (2010).  
538 *Agrobacterium tumefaciens* -mediated transformation of *Cleome gynandra* L., a C 4  
539 dicotyledon that is closely related to *Arabidopsis thaliana*. *Journal of Experimental Botany*,  
540 61(5), 1311–1319. <http://doi.org/10.1093/jxb/erq009>

541 Nguyen, M. Q., Zhou, Z., Marks, C. A., Ryba, N. J. P., & Belluscio, L. (2007). Prominent Roles for  
542 Odorant Receptor Coding Sequences in Allelic Exclusion. *Cell*, 131(5), 1009–1017.  
543 <http://doi.org/10.1016/j.cell.2007.10.050>

544 Nomura, M., Sentoku, N., Nishimura, A., Lin, J. H., Honda, C., Taniguchi, M., ... Matsuoka, M.  
545 (2000). The evolution of C4 plants: Acquisition of cis-regulatory sequences in the promoter of  
546 C4-type pyruvate, orthophosphate dikinase gene. *Plant Journal*, 22(3), 211–221.  
547 <http://doi.org/10.1046/j.1365-313X.2000.00726.x>

548 Ray, D. K., Ramankutty, N., Mueller, N. D., West, P. C., & Foley, J. a. (2012). Recent patterns of  
549 crop yield growth and stagnation. *Nature Communications*, 3, 1293.  
550 <http://doi.org/10.1038/ncomms2296>

551 Robinson, M., Lilley, R., Little, S., & Emtage, J. (1984). Codon usage can affect efficiency of  
552 translation of genes in Escherichia coli. *Nucleic Acids*. Retrieved from  
553 <http://nar.oxfordjournals.org/content/12/17/6663.short>

554 Sage, R. F. (2004). Tansley review: The evolution of C4 photosynthesis. *New Phytol*, 161, 30.  
555 Retrieved from <http://onlinelibrary.wiley.com/doi/10.1111/j.1469-8137.2004.00974.x/full>

556 Sage, R. F., Wedin, D. a, & Li, M. (1999). The Biogeography of C4 Photosynthesis: Patterns and  
557 Controlling Factors. *C4 Plant Biology*, 313–373. [http://doi.org/10.1016/B978-012614440-](http://doi.org/10.1016/B978-012614440-6/50011-2)  
558 [6/50011-2](http://doi.org/10.1016/B978-012614440-6/50011-2)

559 Sánchez, R., & Cejudo, F. (2003). Identification and expression analysis of a gene encoding a  
560 bacterial-type phosphoenolpyruvate carboxylase from Arabidopsis and rice. *Plant Physiology*,  
561 132(June), 949–957. <http://doi.org/10.1104/pp.102.019653.1997>

562 Schranz, M. E., & Mitchell-Olds, T. (2006). Independent ancient polyploidy events in the sister  
563 families Brassicaceae and Cleomaceae. *The Plant Cell*, 18(5), 1152–1165.  
564 <http://doi.org/10.1105/tpc.106.041111>

565 Schulze, S., Mant, A., Kossmann, J., & Lloyd, J. R. (2004). Identification of an Arabidopsis  
566 inorganic pyrophosphatase capable of being imported into chloroplasts. *FEBS Letters*, 565(1–  
567 3), 101–105. <http://doi.org/10.1016/j.febslet.2004.03.080>

568 Sheen, J. (1991). Molecular mechanisms underlying the differential expression of maize pyruvate,  
569 orthophosphate dikinase genes. *The Plant Cell*, 3(3), 225–245.  
570 <http://doi.org/10.1105/tpc.3.3.225>

571 Sheen, J. (1999). C 4 Gene Expression. *Annual Review of Plant Physiology and Plant Molecular*  
572 *Biology*, 50(1), 187–217. Retrieved from  
573 <http://www.annualreviews.org/doi/pdf/10.1146/annurev.arplant.50.1.187>

574 Sinha, N. R., & Kellogg, E. A. (1996). Parallelism and diversity in multiple origins of C4  
575 photosynthesis in the grass family. *American Journal of Botany*, 83(11), 1458–1470.  
576 <http://doi.org/10.2307/2446101>

577 Stergachis, A. B., Haugen, E., Shafer, A., Fu, W., Vernot, B., Reynolds, A., ...  
578 Stamatoyannopoulos, J. a. (2013). Exonic transcription factor binding directs codon choice  
579 and affects protein evolution. *Science (New York, N.Y.)*, 342(6164), 1367–72.  
580 <http://doi.org/10.1126/science.1243490>

581 Sullivan, A. M., Arsovski, A. A., Lempe, J., Bubb, K. L., Weirauch, M. T., Sabo, P. J., ...  
582 Stamatoyannopoulos, J. A. (2014). Mapping and dynamics of regulatory DNA and  
583 transcription factor networks in A. thaliana. *Cell Reports*, 8(6), 2015–2030.  
584 <http://doi.org/10.1016/j.celrep.2014.08.019>

585 Trimmomatic. (2014). a flexible trimmer for Illumina sequence data. *Bioinformatics*, 30, 2114.  
586 Retrieved from  
587 <http://bioinformatics.oxfordjournals.org/content/early/2014/04/12/bioinformatics.btu170.short>

588 Tuller, T., Waldman, Y. Y., Kupiec, M., & Ruppin, E. (2010). Translation efficiency is determined by  
589 both codon bias and folding energy. *Proceedings of the National Academy of Sciences of the*  
590 *United States of America*, 107(8), 3645–50. <http://doi.org/10.1073/pnas.0909910107>

591 Tümpel, S., Cambroner, F., Sims, C., Krumlauf, R., & Wiedemann, L. M. (2008). A regulatory  
592 module embedded in the coding region of Hoxa2 controls expression in rhombomere 2.  
593 *Proceedings of the National Academy of Sciences of the United States of America*, 105(51),  
594 20077–20082. <http://doi.org/10.1073/pnas.0806360105>

595 Viret, J., Mabrouk, Y., & Bogorad, L. (1994). Transcriptional photoregulation of cell-type-preferred  
596 expression of maize rbcS-m3: 3' and 5' sequences are involved. *Proceedings of the*. Retrieved  
597 from <http://www.pnas.org/content/91/18/8577.short>

598 Werneke, J. M., Zielinski, R. E., & Ogren, W. L. (1988). Structure and expression of spinach leaf  
599 cDNA encoding ribulosebiphosphate carboxylase/oxygenase activase. *Proceedings of the*  
600 *National Academy of Sciences of the United States of America*, 85(3), 787–91. Retrieved from  
601 [http://www.pubmedcentral.nih.gov/articlerender.fcgi?artid=279640&tool=pmcentrez&rendertype](http://www.pubmedcentral.nih.gov/articlerender.fcgi?artid=279640&tool=pmcentrez&rendertype=abstract)  
602 [e=abstract](http://www.pubmedcentral.nih.gov/articlerender.fcgi?artid=279640&tool=pmcentrez&rendertype=abstract)

603 Westhoff, P., & Gowik, U. (2010). Evolution of C4 photosynthesis--looking for the master switch.  
604 *Plant Physiology*, 154(2), 598–601. <http://doi.org/10.1104/pp.110.161729>

605 Williams, B., Burgess, S., & Reyna-Llorens, I. (2016). An untranslated cis-element regulates the  
606 accumulation of multiple C4 enzymes in Gynandropsis gynandra mesophyll cells. *The Plant*.  
607 Retrieved from <http://www.plantcell.org/content/28/2/454.short>

608 Williams, B. P., Johnston, I. G., Covshoff, S., & Hibberd, J. M. (2013). Phenotypic landscape  
609 inference reveals multiple evolutionary paths to C4 photosynthesis. *eLife*, 2, e00961.  
610 <http://doi.org/10.7554/eLife.00961>

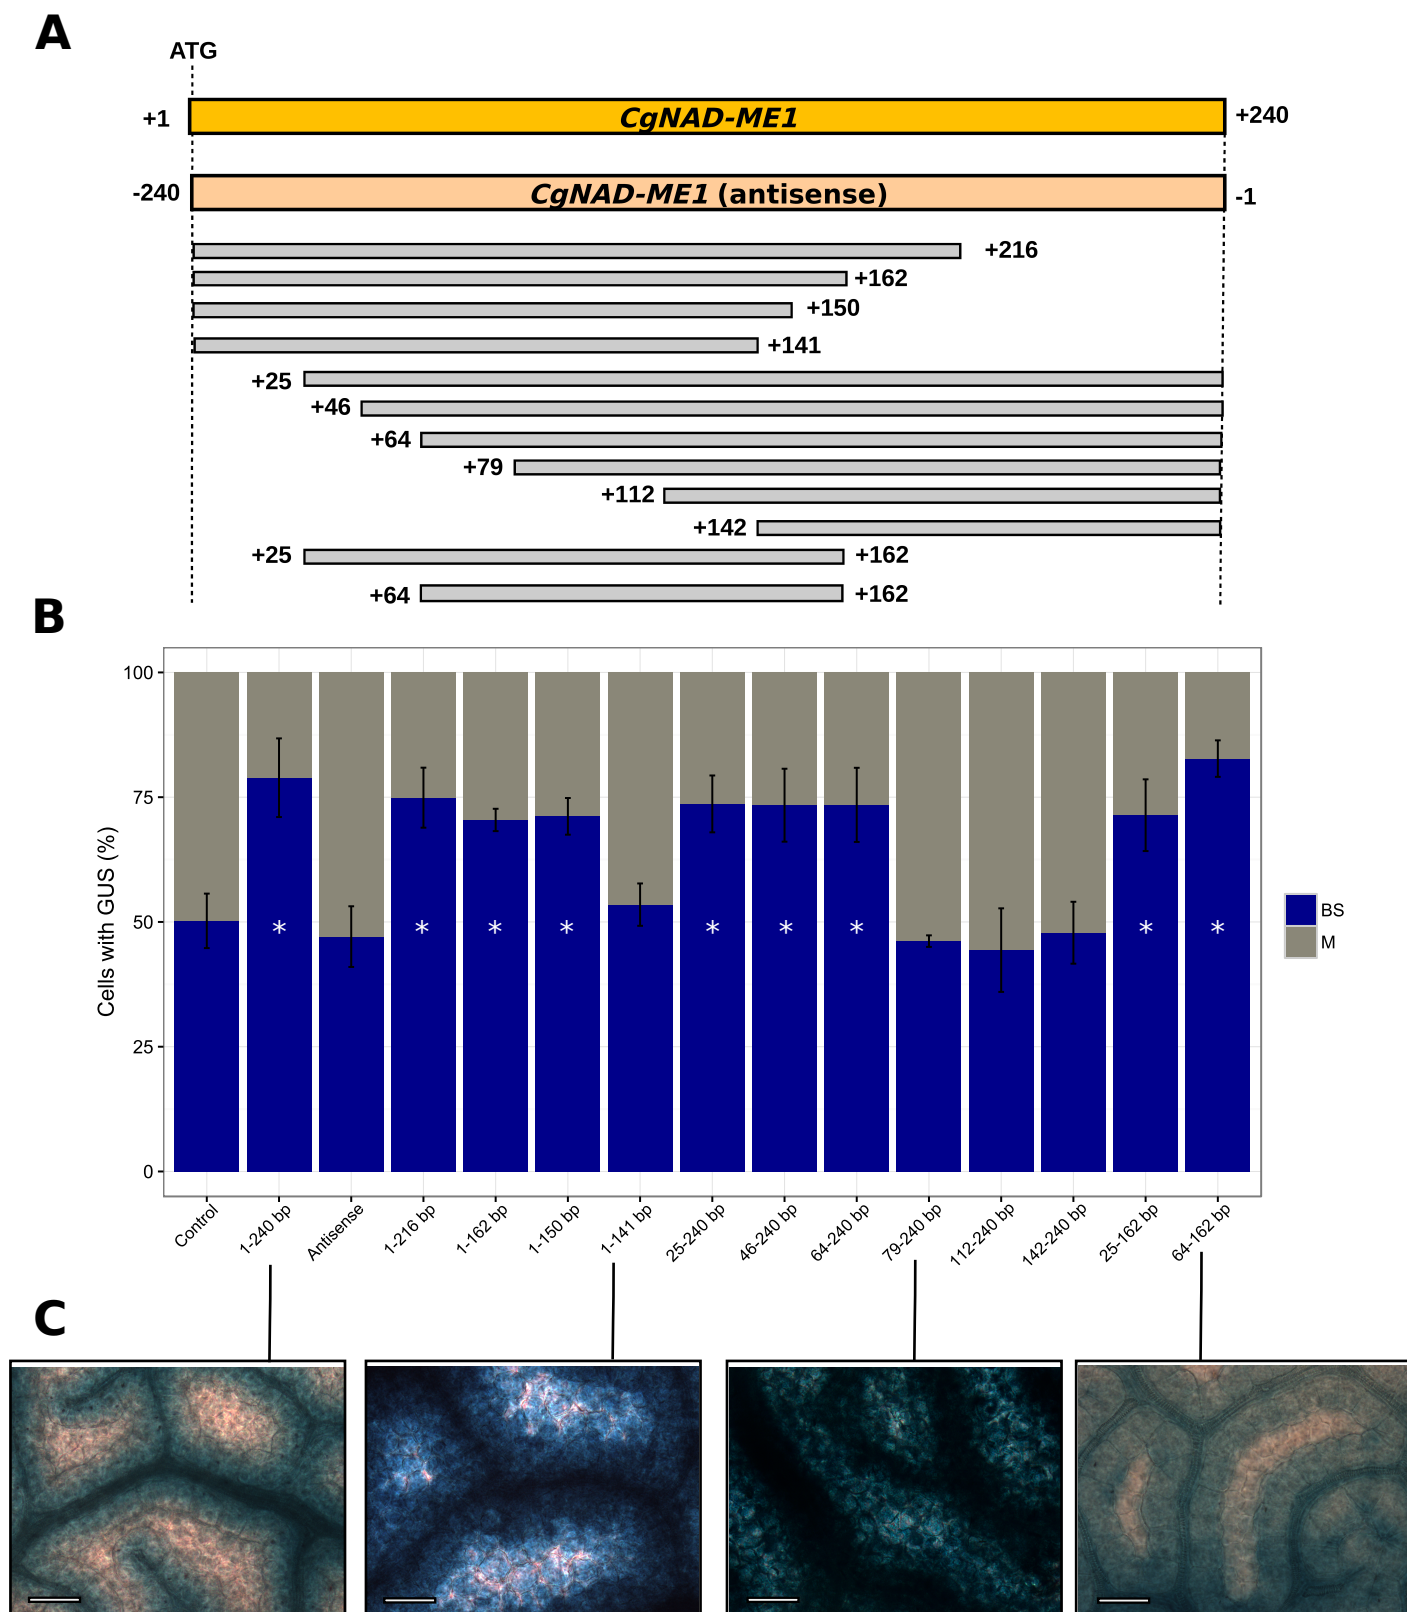

Figure 1

**A**

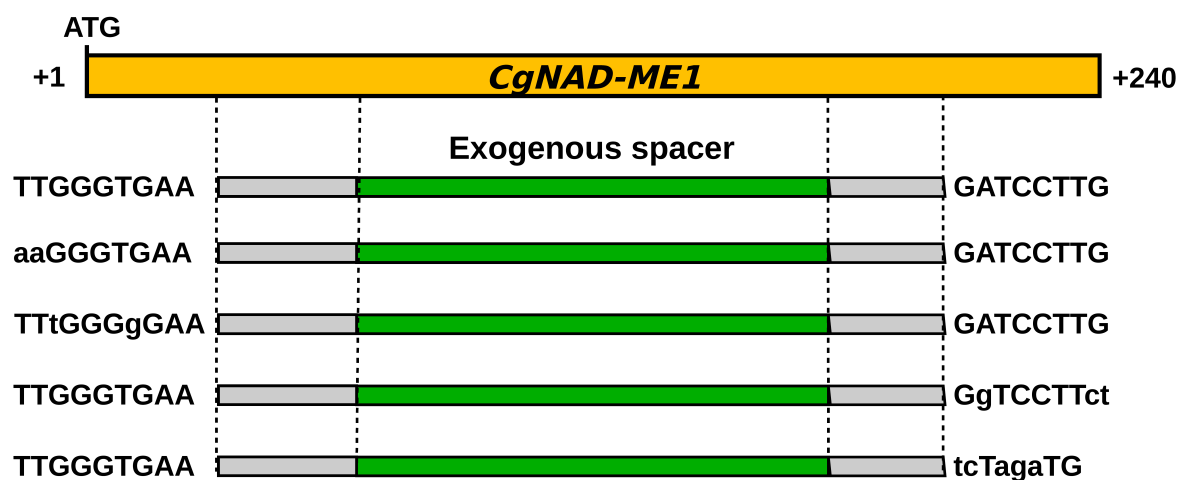

**B**

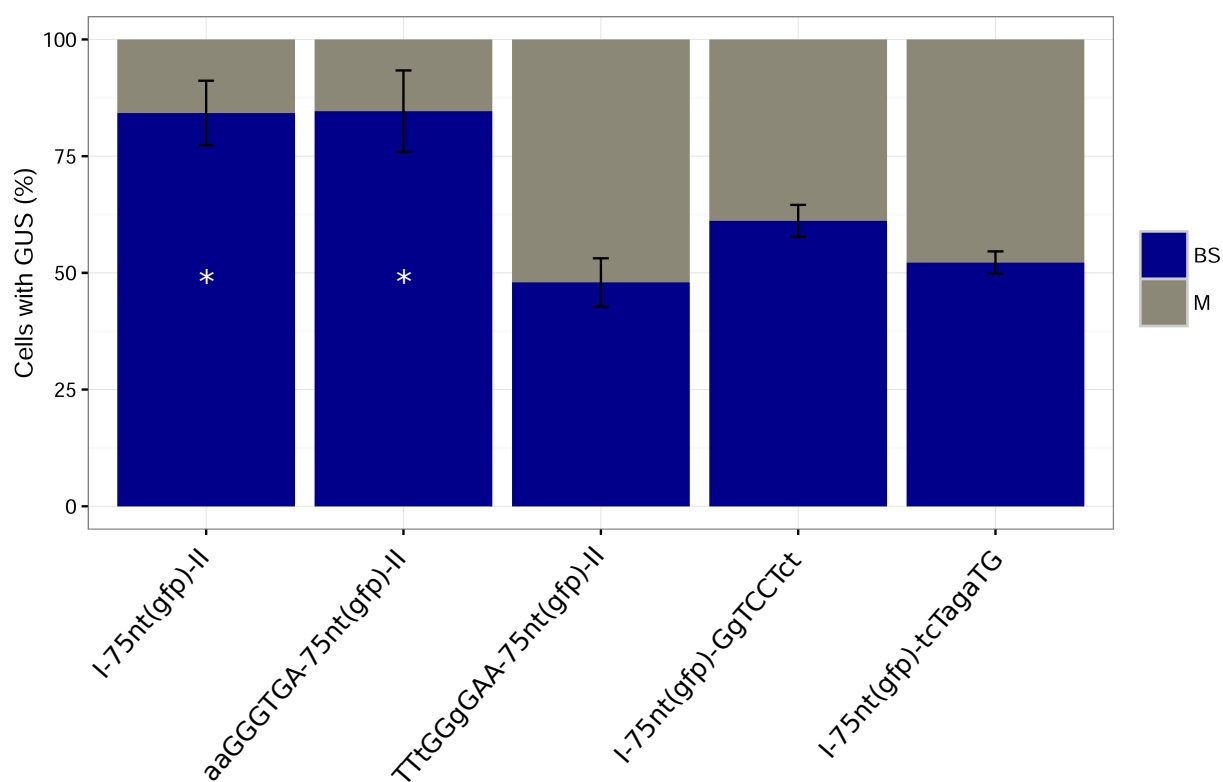

Figure 2

**A**

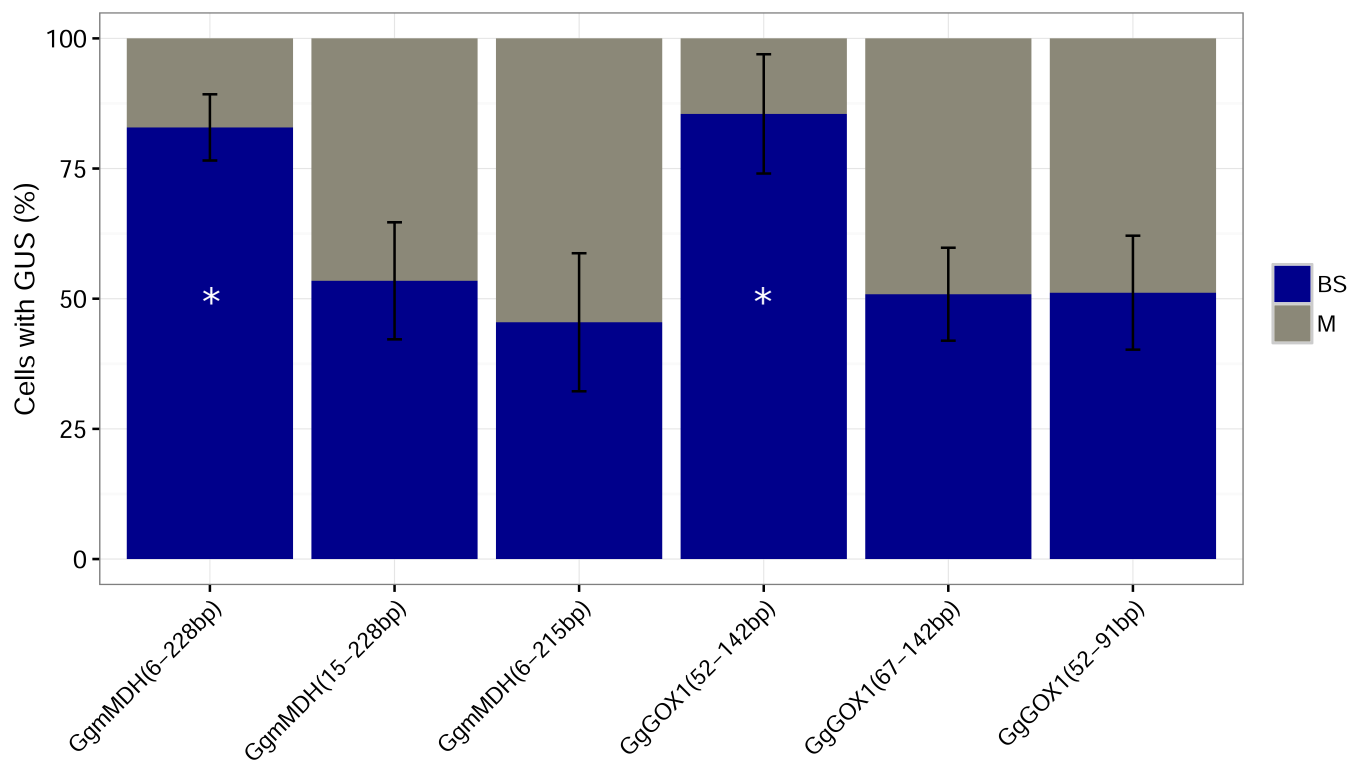

**B**

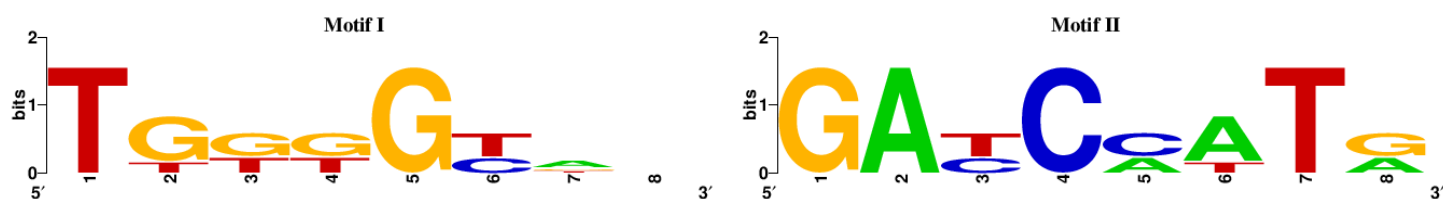

**C**

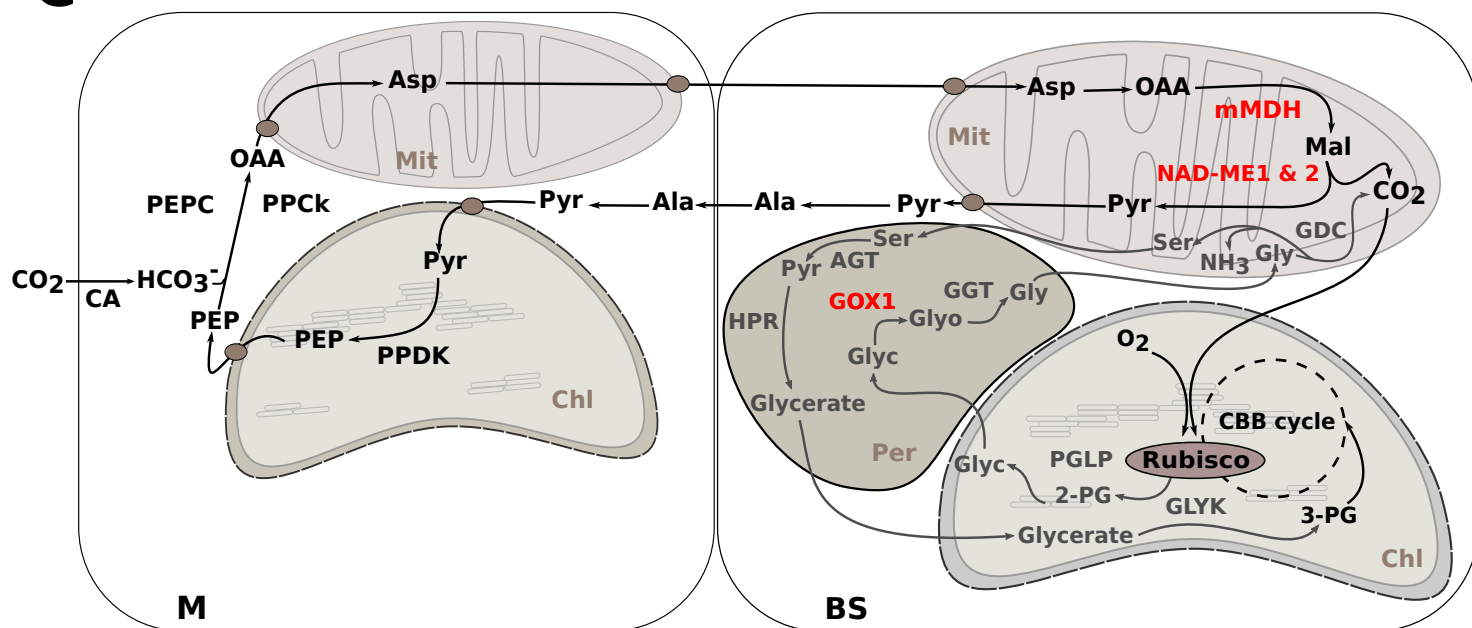

Figure 3

**A**

**Motif I**

GgNAD-ME1 ---ATGGCGTCTGTCGGAGATAAGCTCCGGATTTCGAGGGCTATGACTA-----TGATTCTTAGACGTAGGATT**TTGGGTGA**AACCCC---CAGACGTTTCACTACA  
 AtNAD-ME1 ---ATGGGAAATA--GCCAATAAGCTG-----CCGGCTAAGTTCATCATCTCTCAGCCGAATCCTCCACGGAGAATACTTTACTCATCCGCTGTCAGATCTT**TCACCACA**  
 GgNAD-ME2 ---A**TGTGGAAG**ACTGTTGGTAAATTG-----GCGGCTGGGGCCA-----GAGCCGGT-----GAGTCTC-----GTCGGTGCATGACG  
 AtNAD-ME2 ATGA**TGTGGAAG**AACATTGCTGGGTTGTCGAAGGCAGCGGCAGCGGCAA-----GAACACAC-----GGATCTC-----GGCGGTGCTTTTCC

**Motif II**

GgNAD-ME1 ACGGAGGGCCACCGTCCCACCATTGTCCACAAGCGAAGCCTCAACATCCTTCAC**GATCCTTG**GTT  
 AtNAD-ME1 TCGGAAGGTCACCGTCCCACCATCGTTCTATAACAAGGTCTCGATATCCTCCAT**GATCCTTG**GTT  
 GgNAD-ME2 ACGGCAATCCCTGGGCCATGCATCGTCCACAAG-GTGGCGCTAGTCTTATTCA**TGATCCCTG**GTT  
 AtNAD-ME2 ACAGCGATTCTGGTCTTGCATCGTCCACAAGCGTGGTGTGATATTCTTCAC**GATCCATG**GTT

**B**

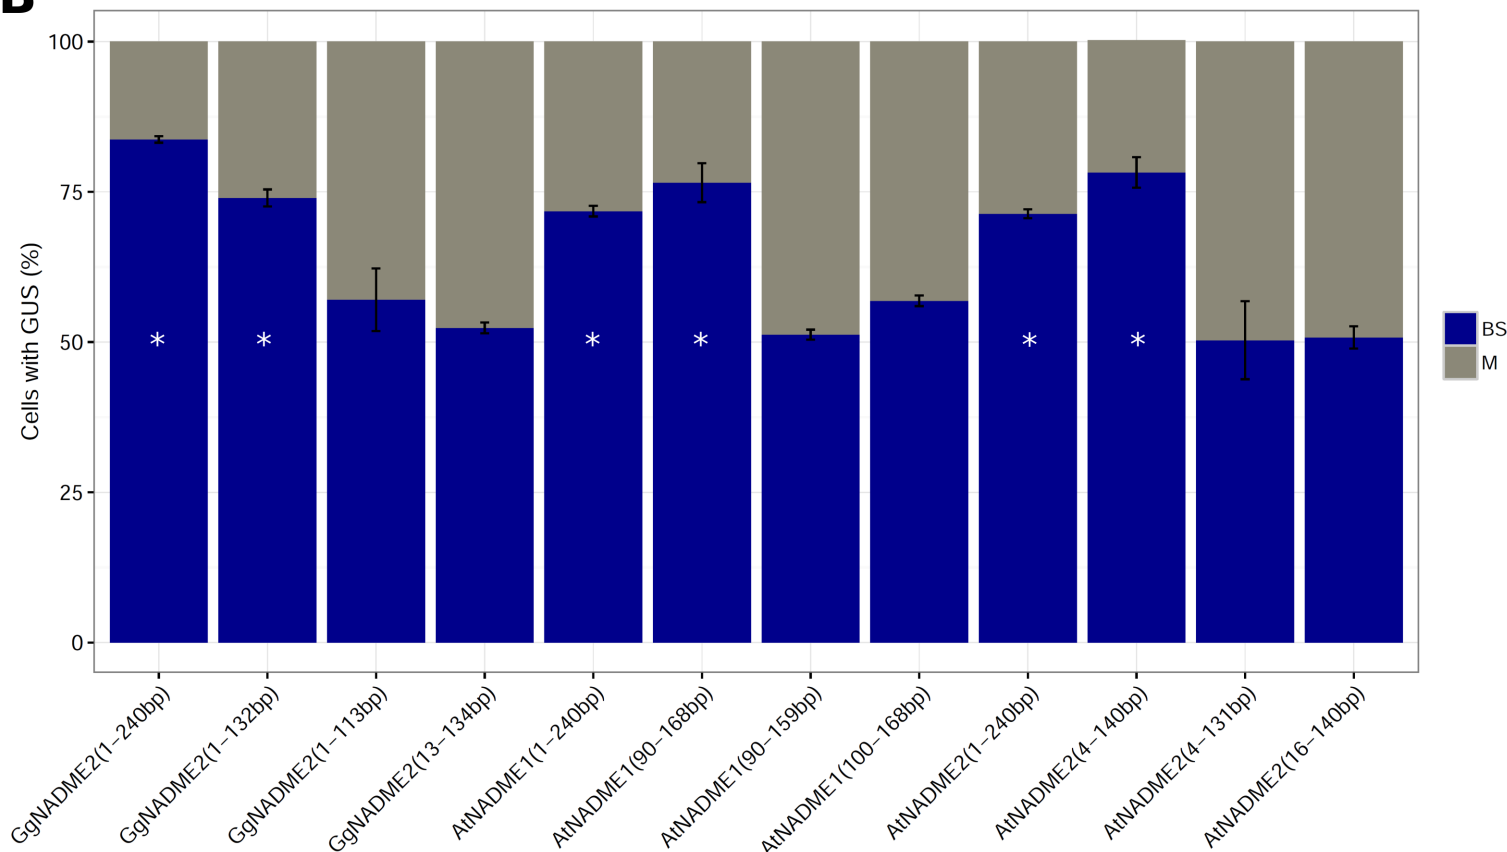

**C**

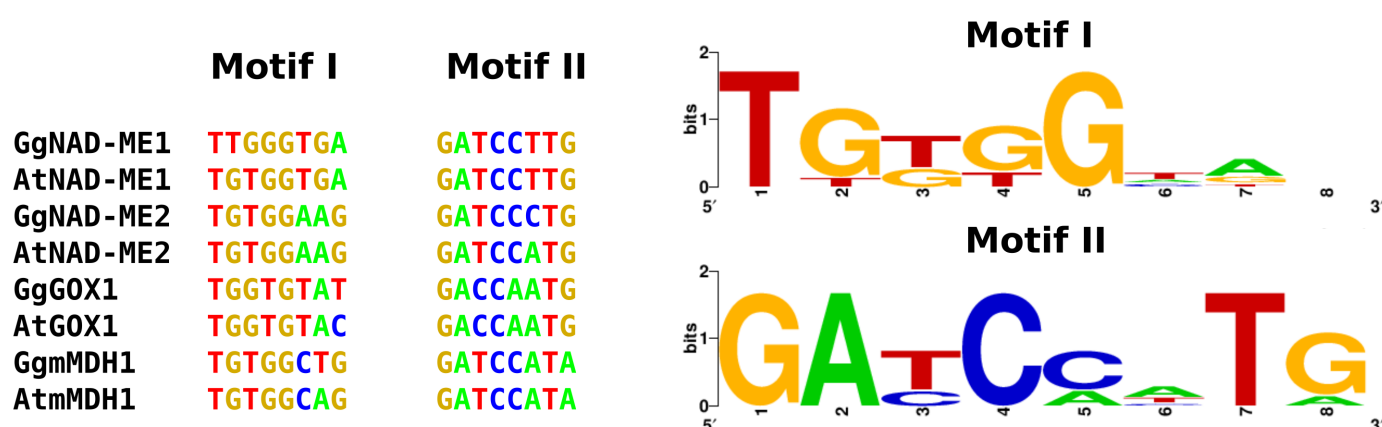

Figure 4



**A**

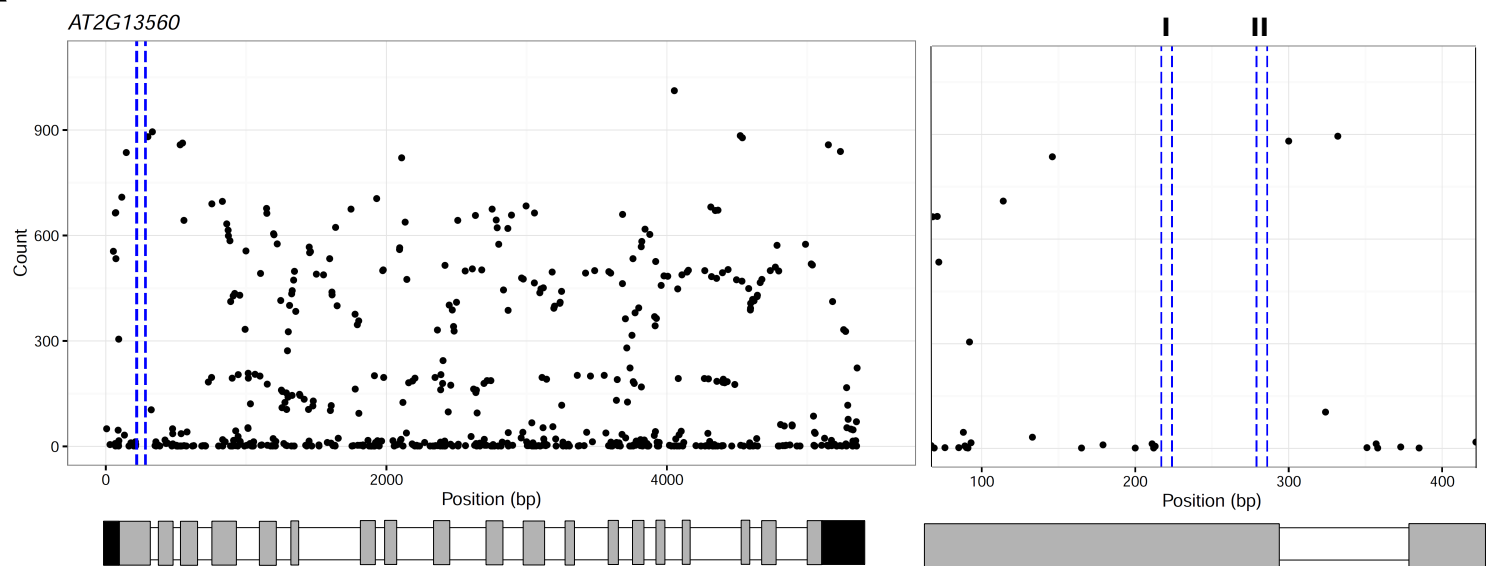

**B**

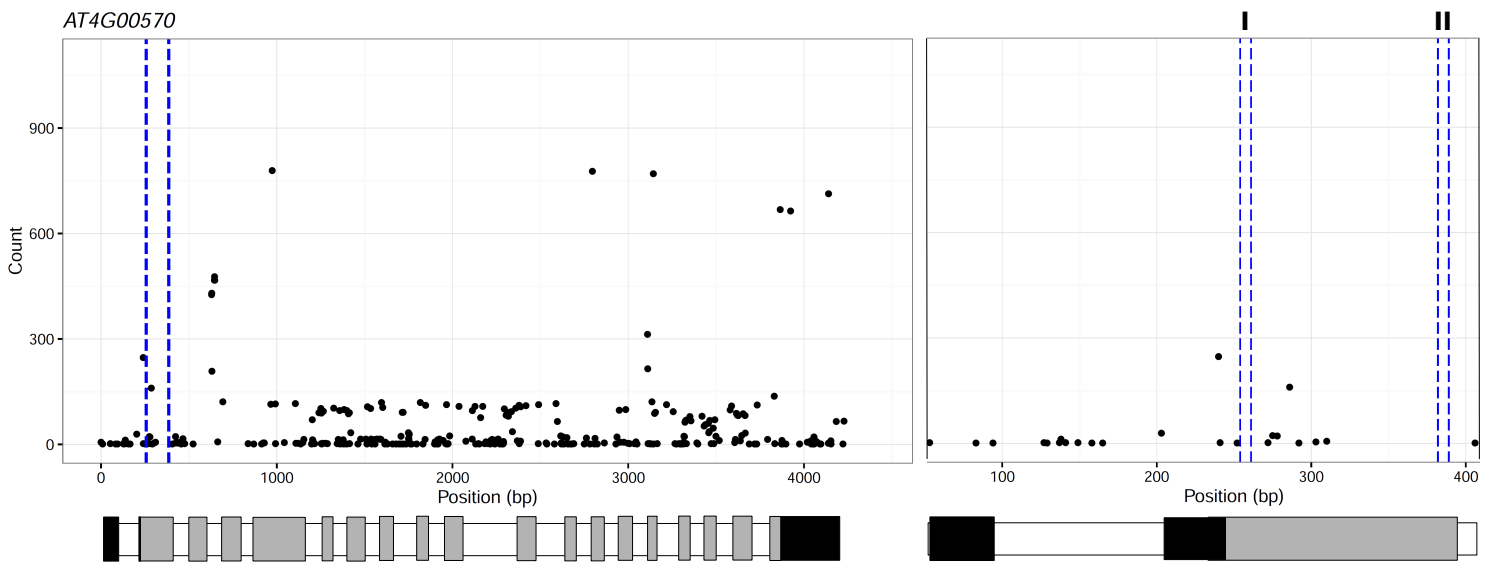

**C**

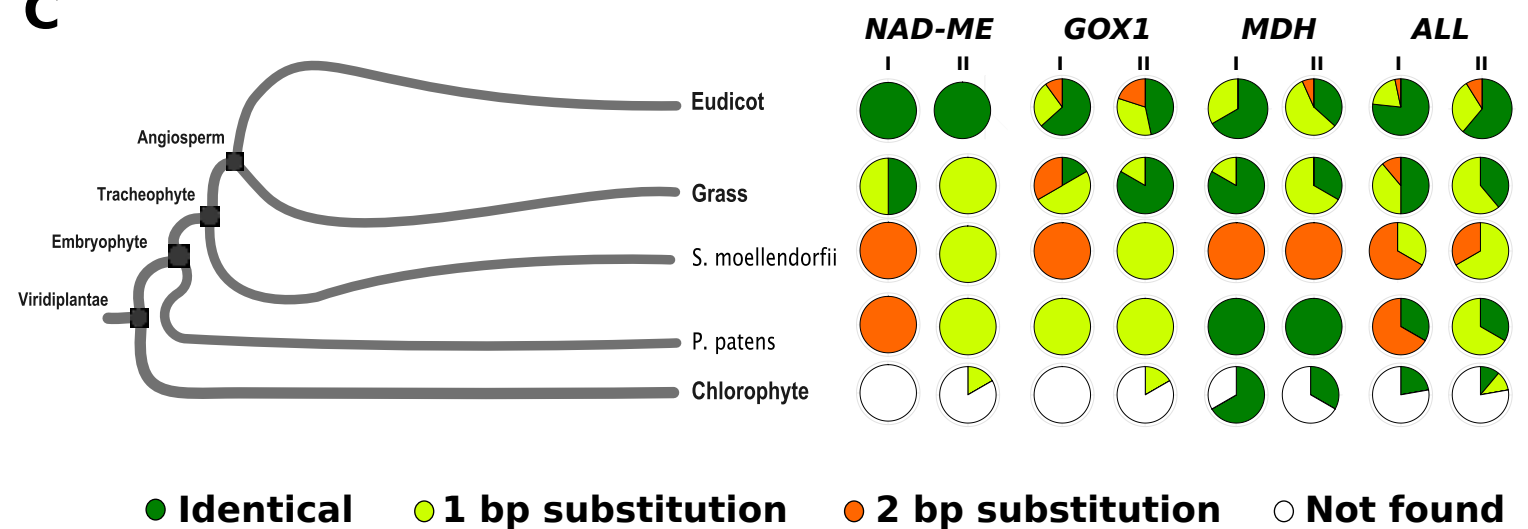

Figure 5



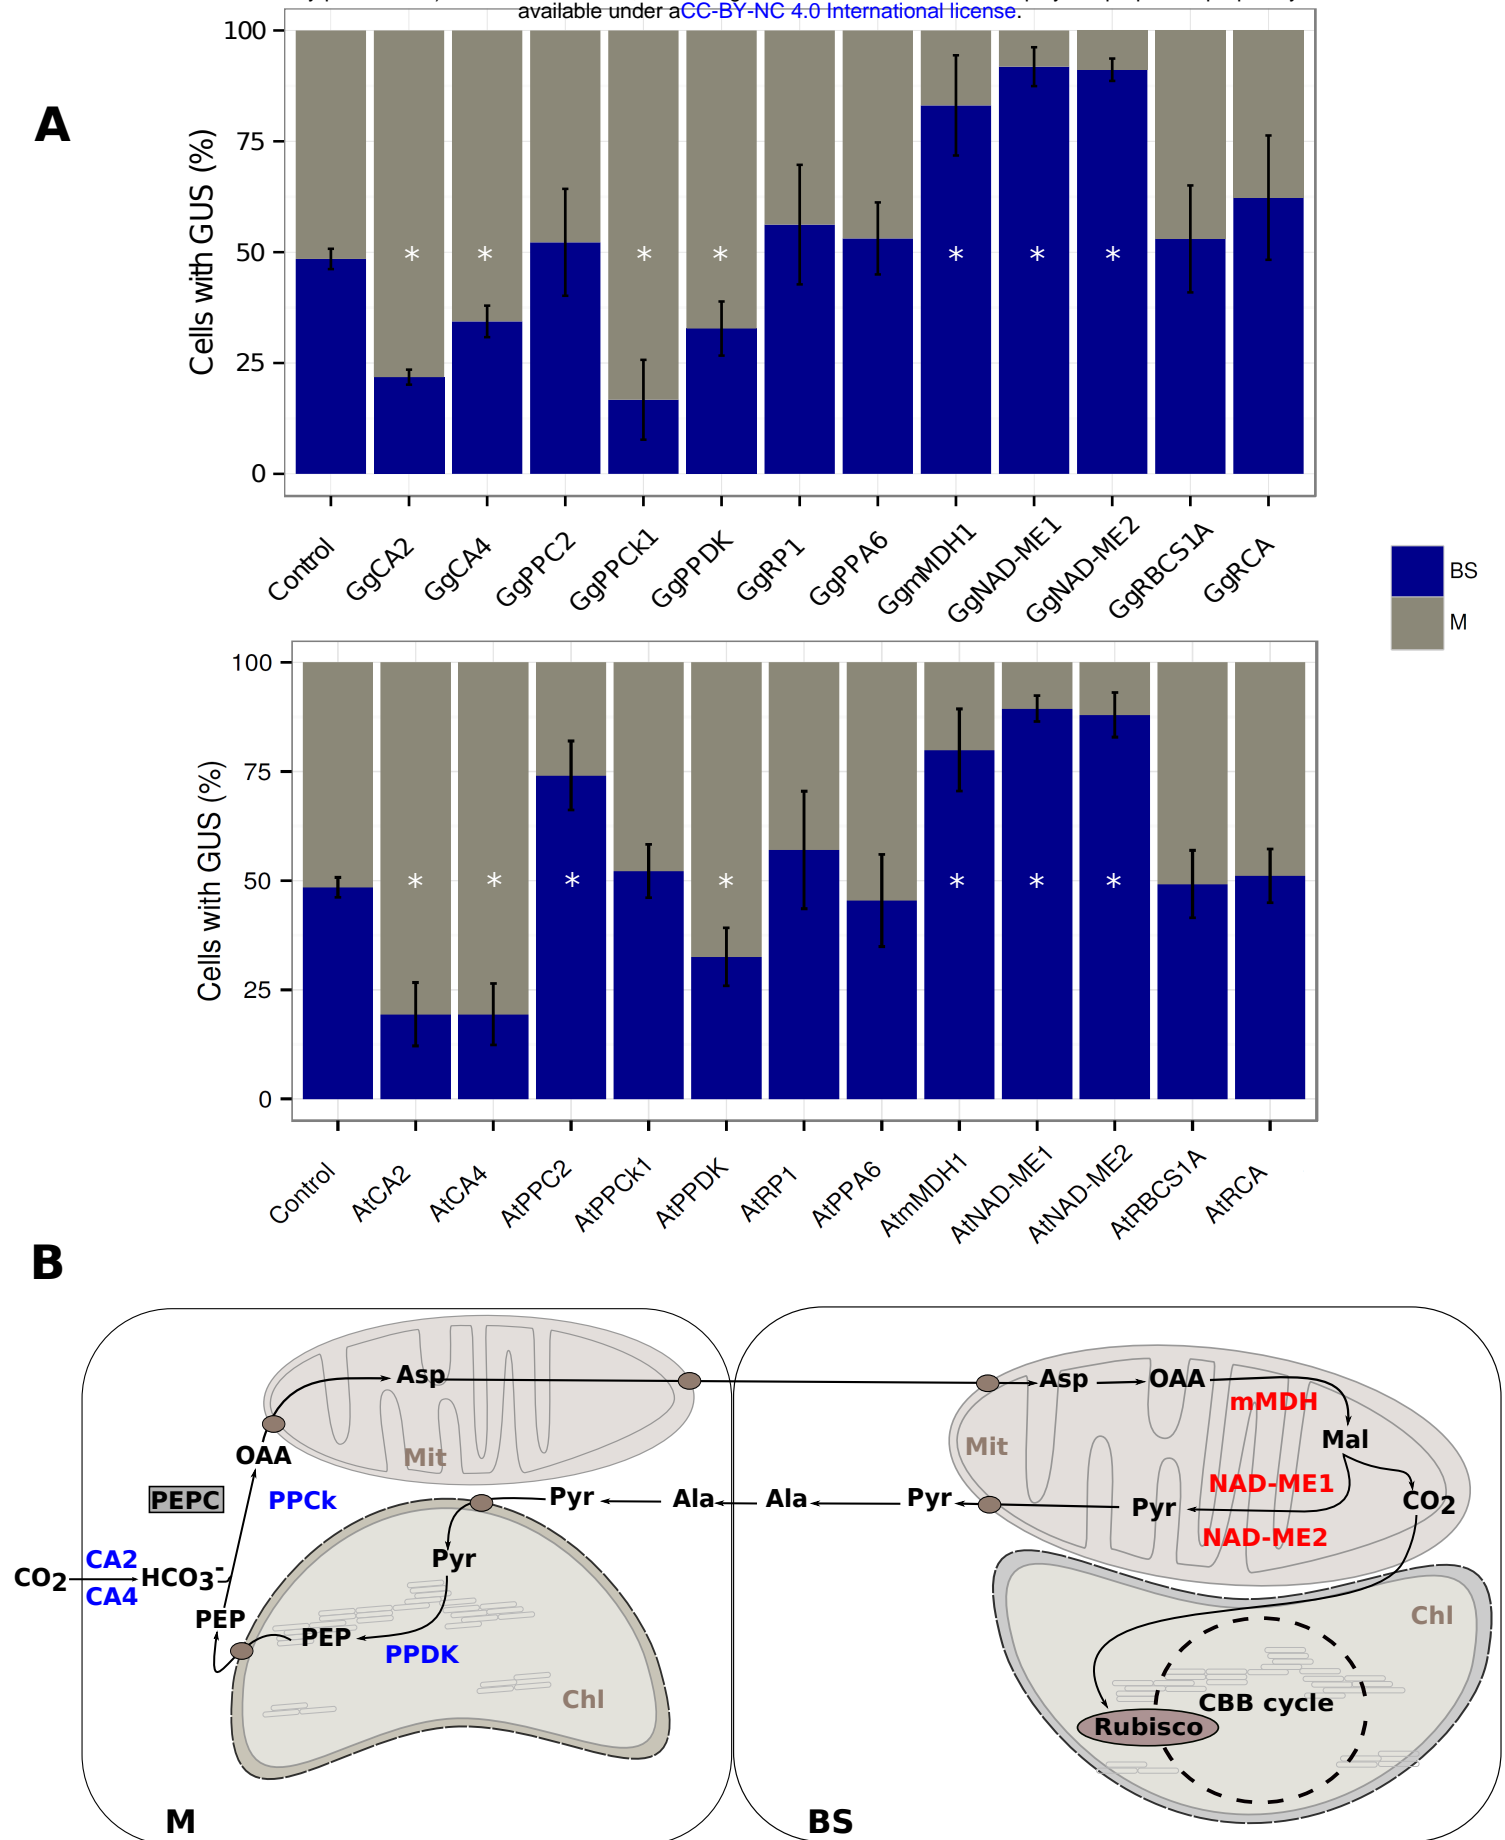

Figure 6

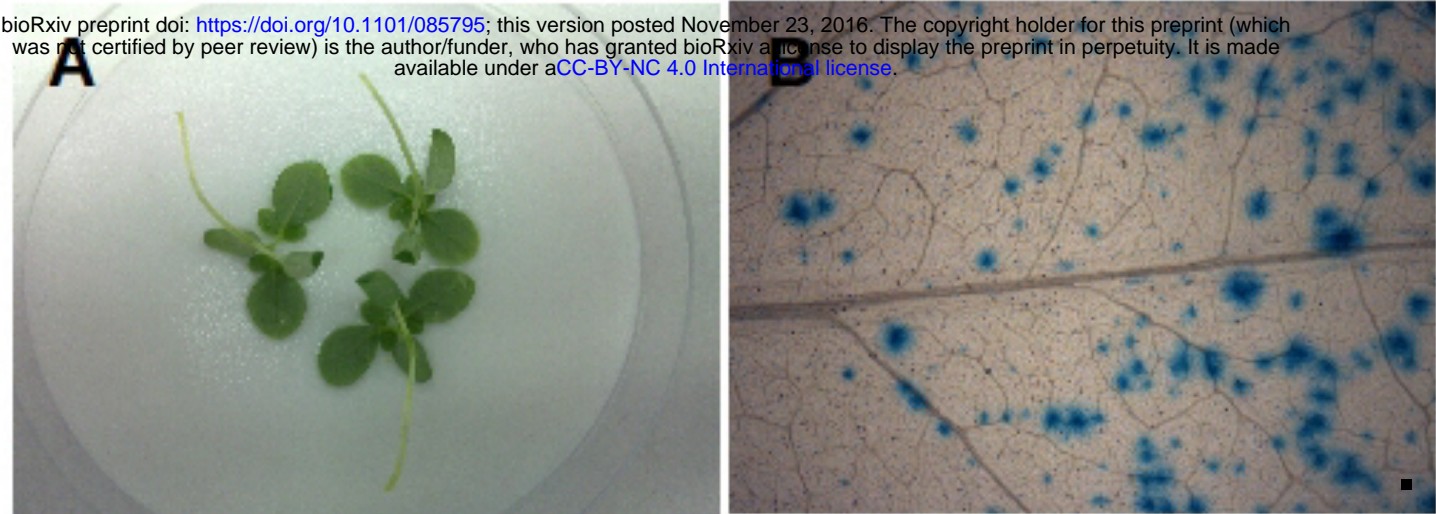

Figure S1

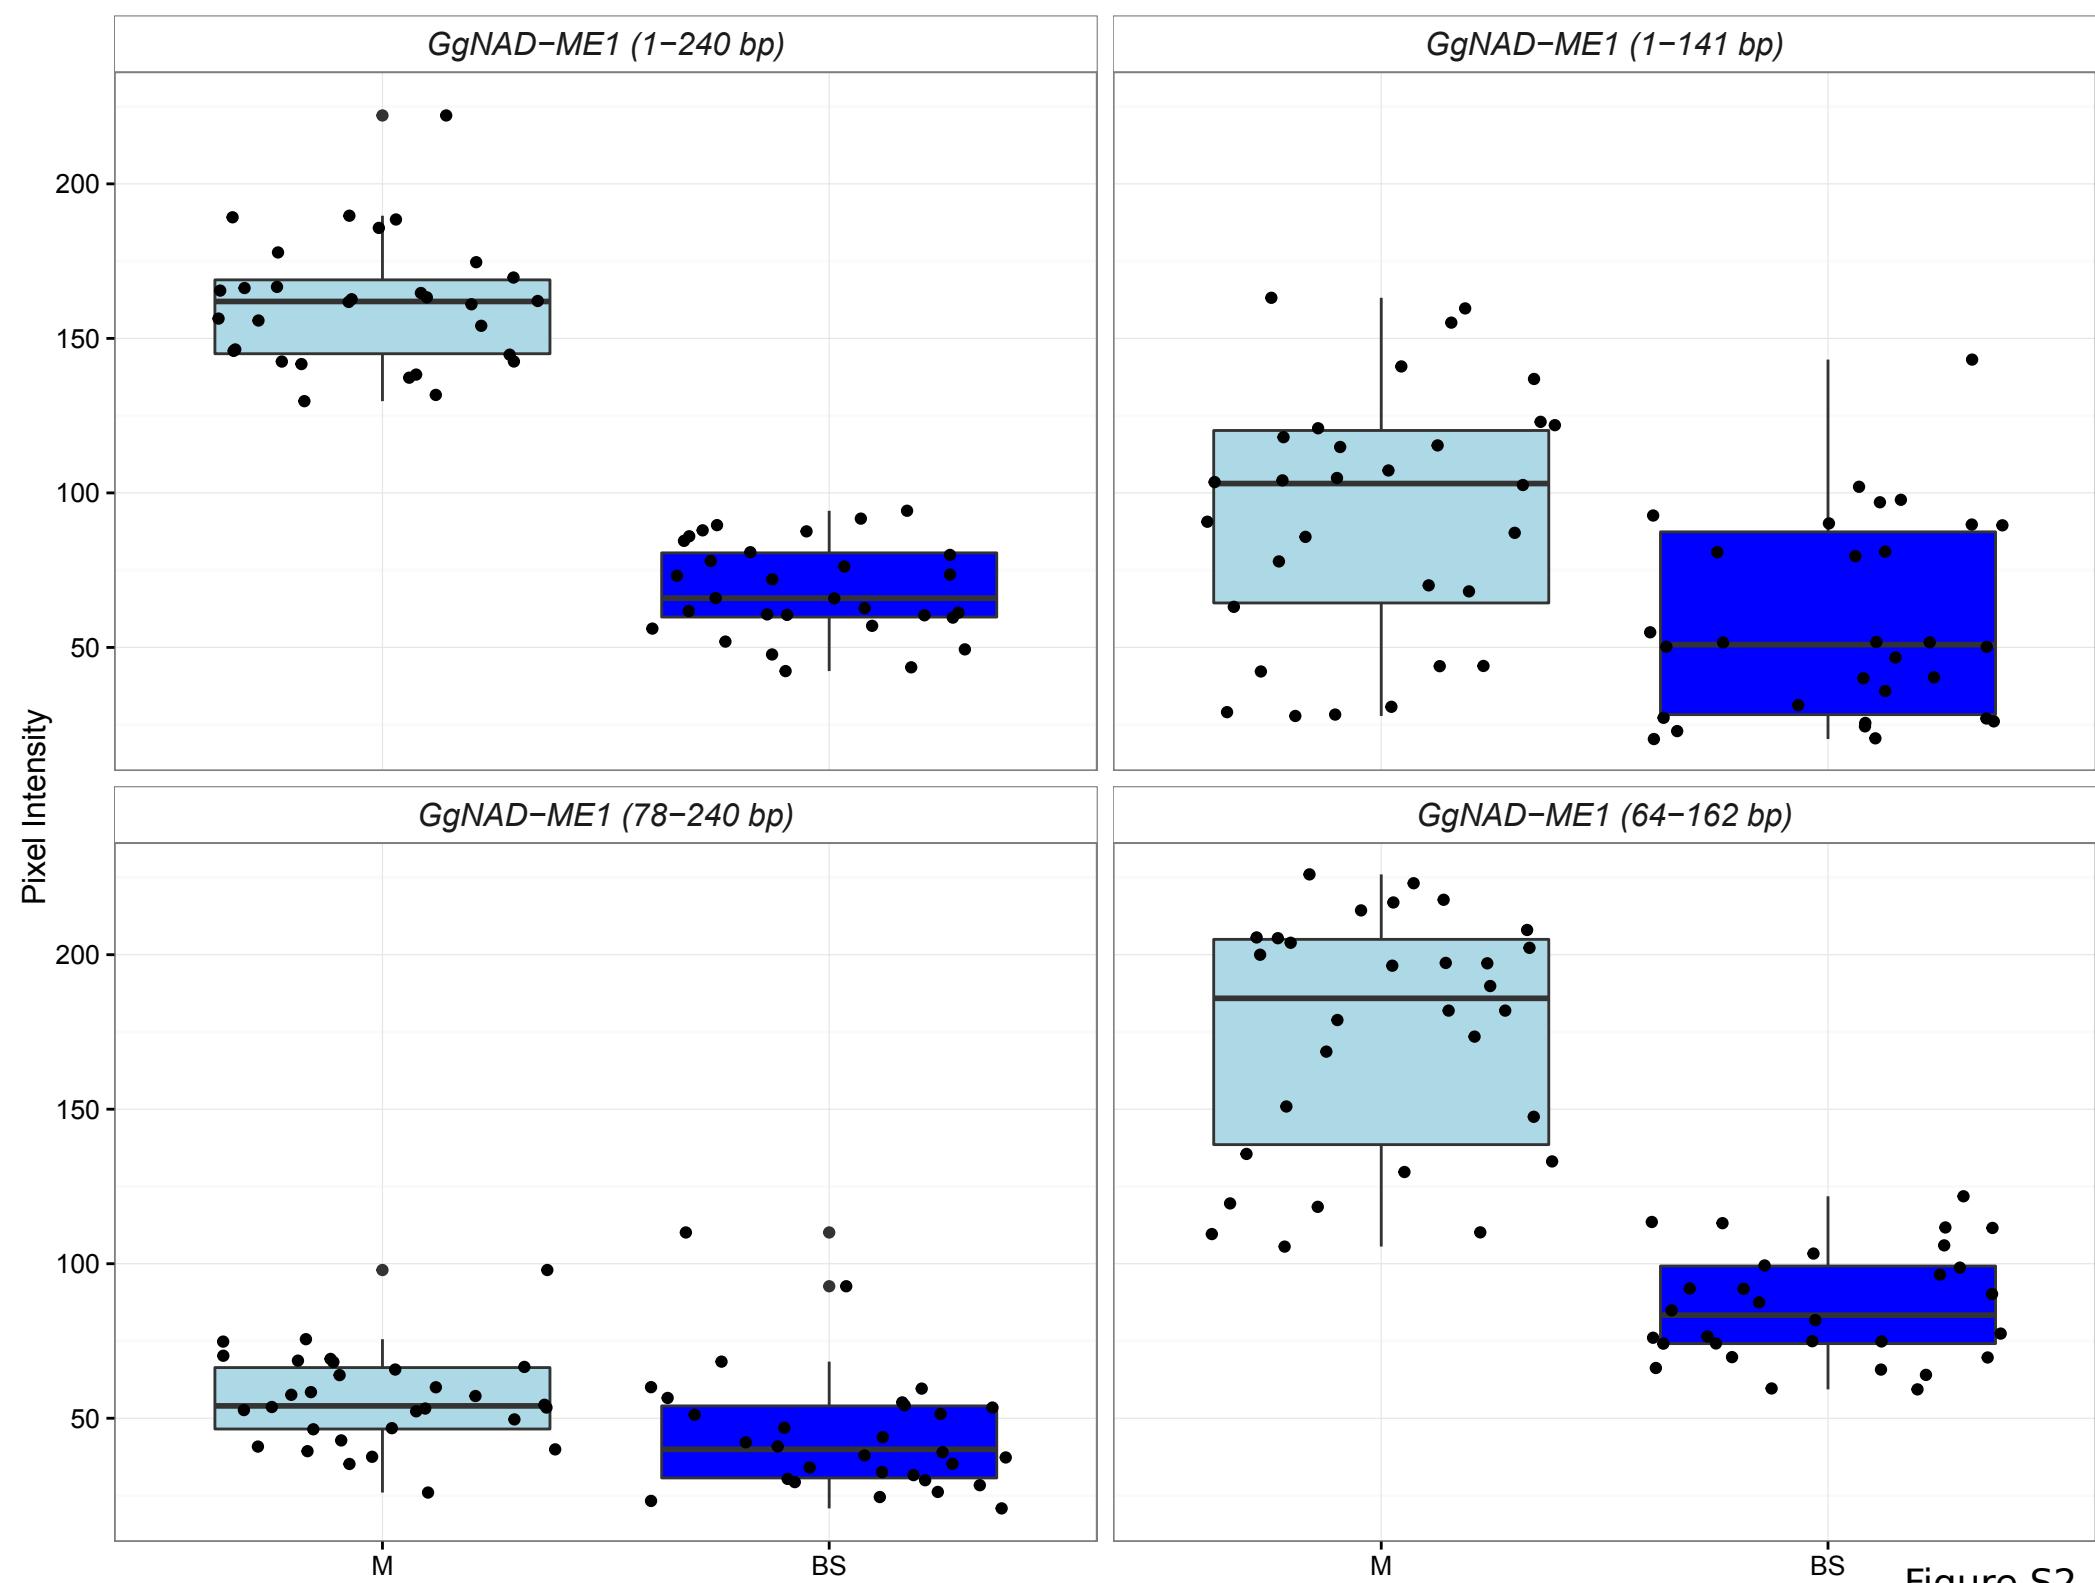

Figure S2

**A**

**ATG (+1)**

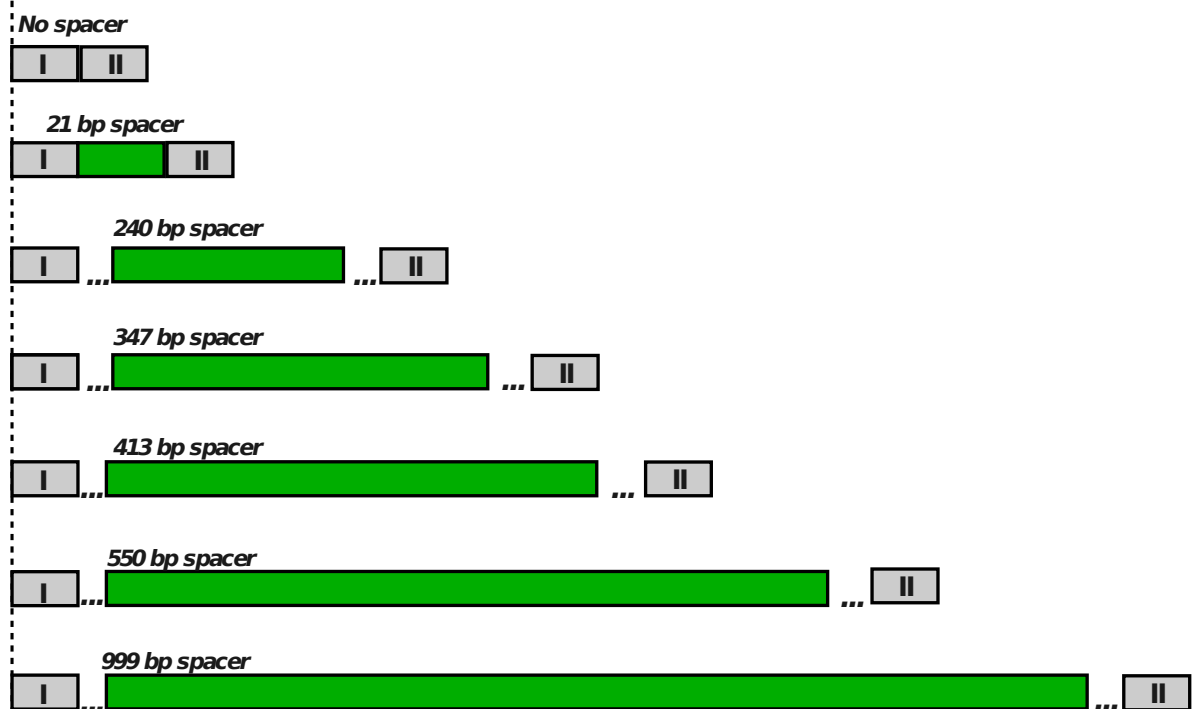

**B**

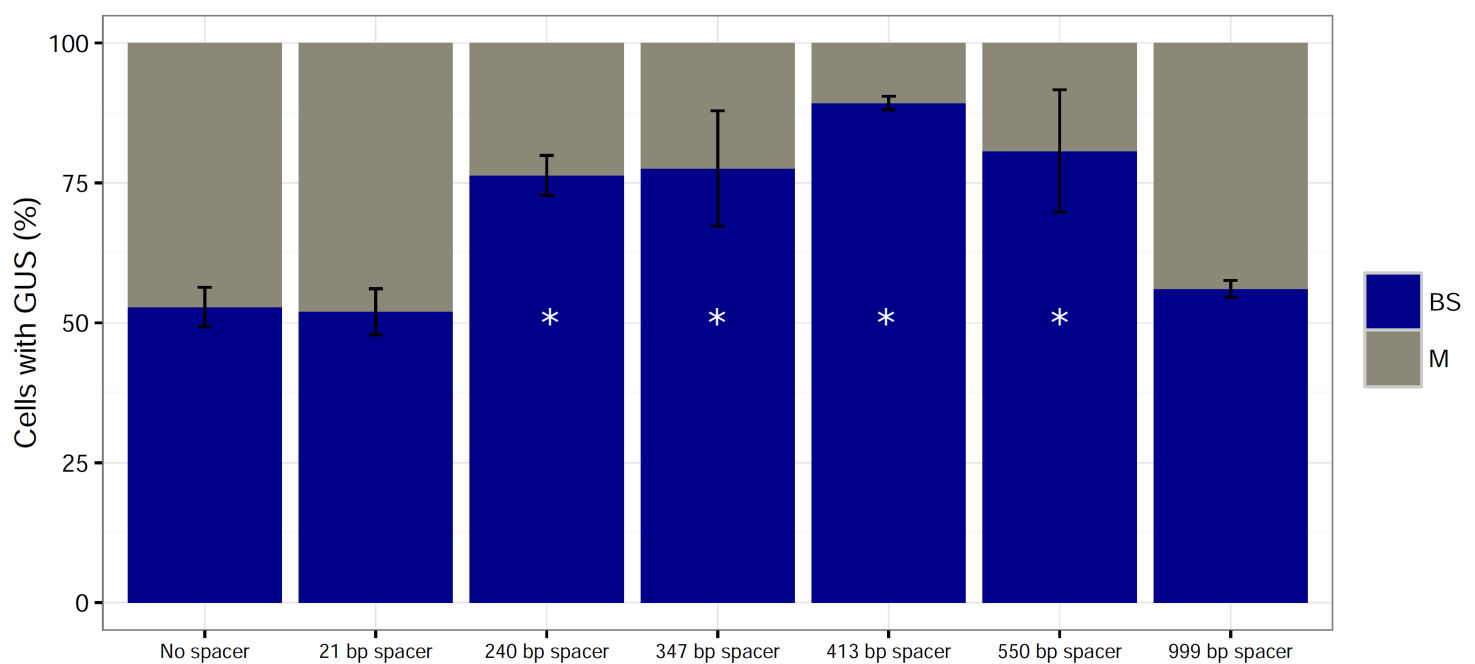

Figure S3

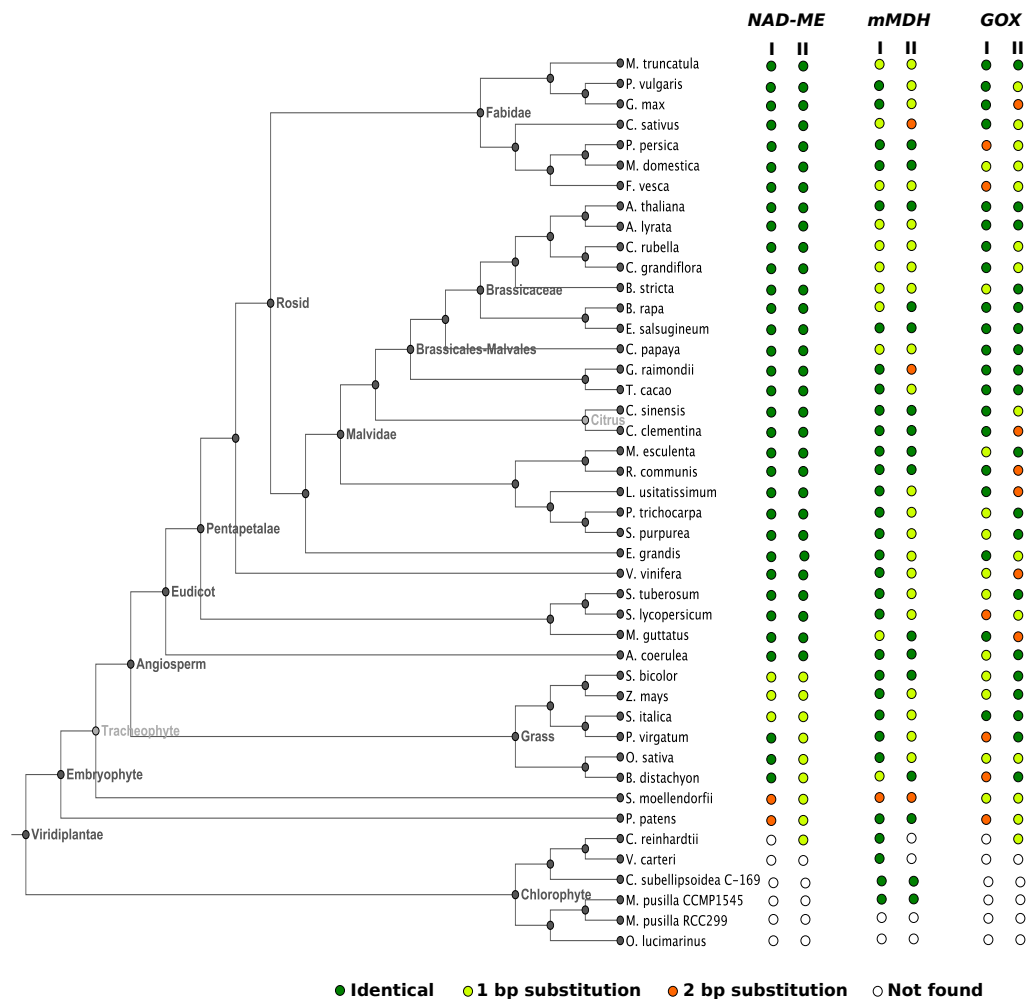

Figure S4
